# Supplementary material for: Functional Characterization of the Cystine-Rich-Receptor-like Kinases (CRKs) and Their Expression Response to Sclerotinia sclerotiorum and Abiotic Stresses in Brassica napus
Source: MDPI journal article supplement (doi:10.3390/ijms24010511), 2022-12-28
Supplement: s1 [file s1]

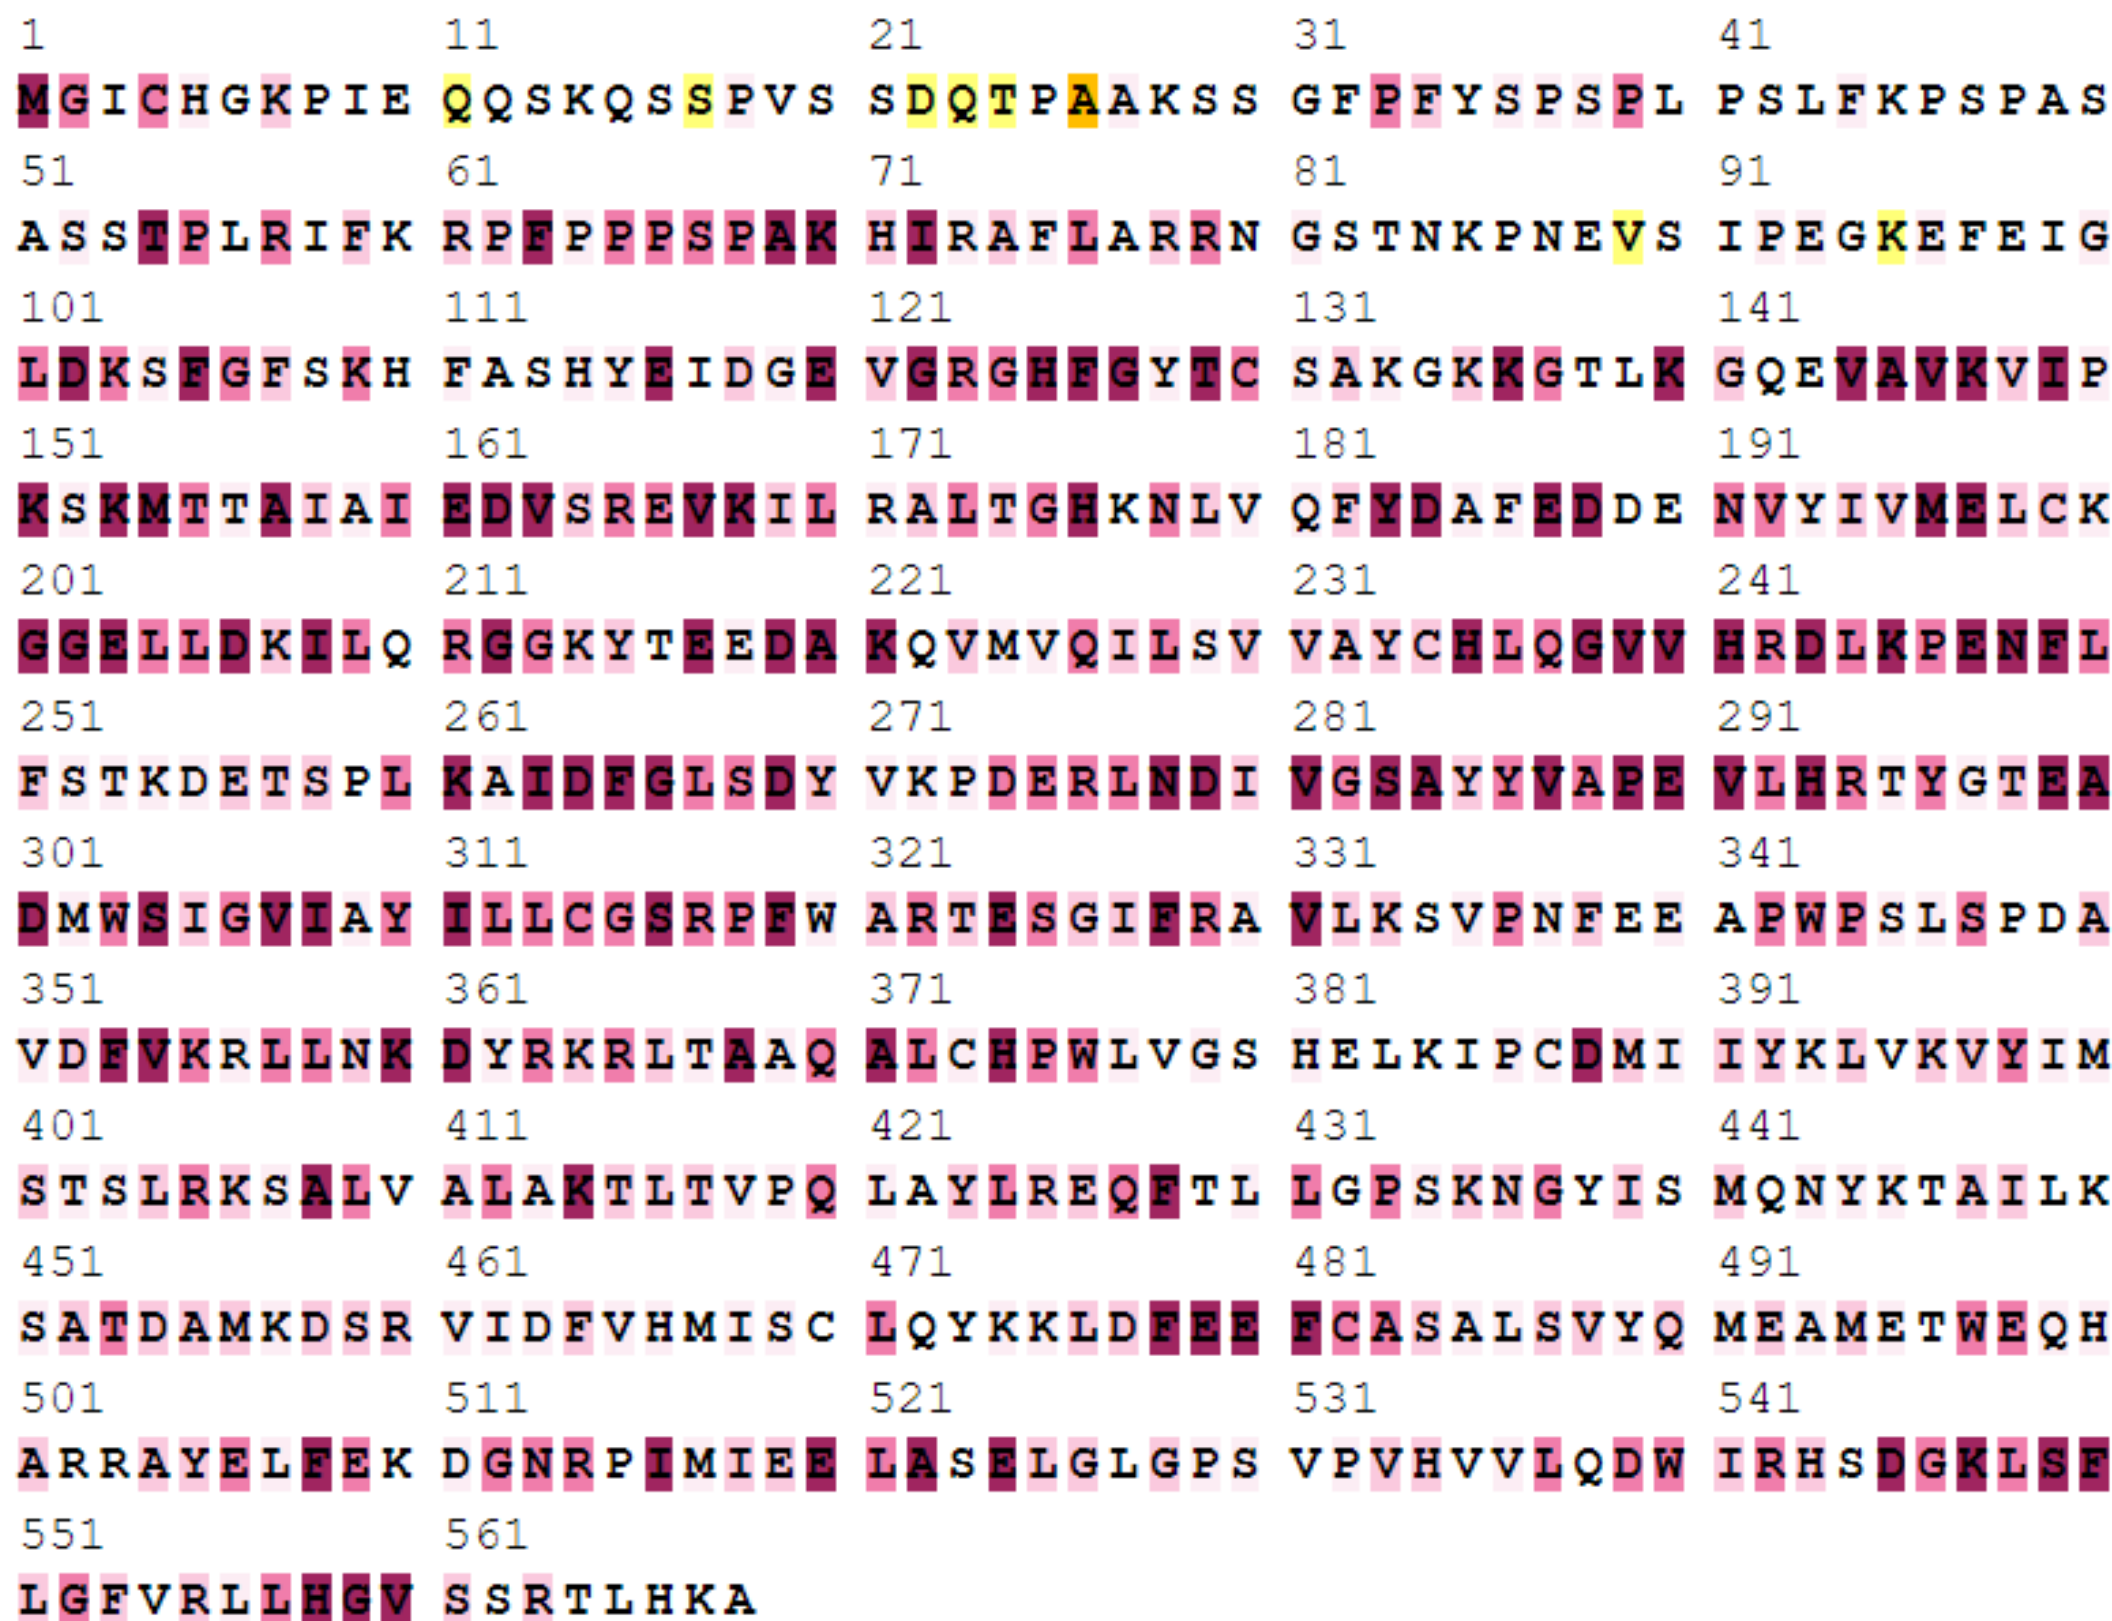

Legend:

The selection scale:

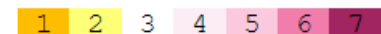

Positive selection

Purifying selection

Fig. S4. Site specific selection prediction of *B. napus* CRK gene family
