# Supplementary material for: Functional Characterization of the Cystine-Rich-Receptor-like Kinases (CRKs) and Their Expression Response to Sclerotinia sclerotiorum and Abiotic Stresses in Brassica napus
Source: MDPI journal article supplement (doi:10.3390/ijms24010511), 2022-12-28
Supplement: s1 [file s1]

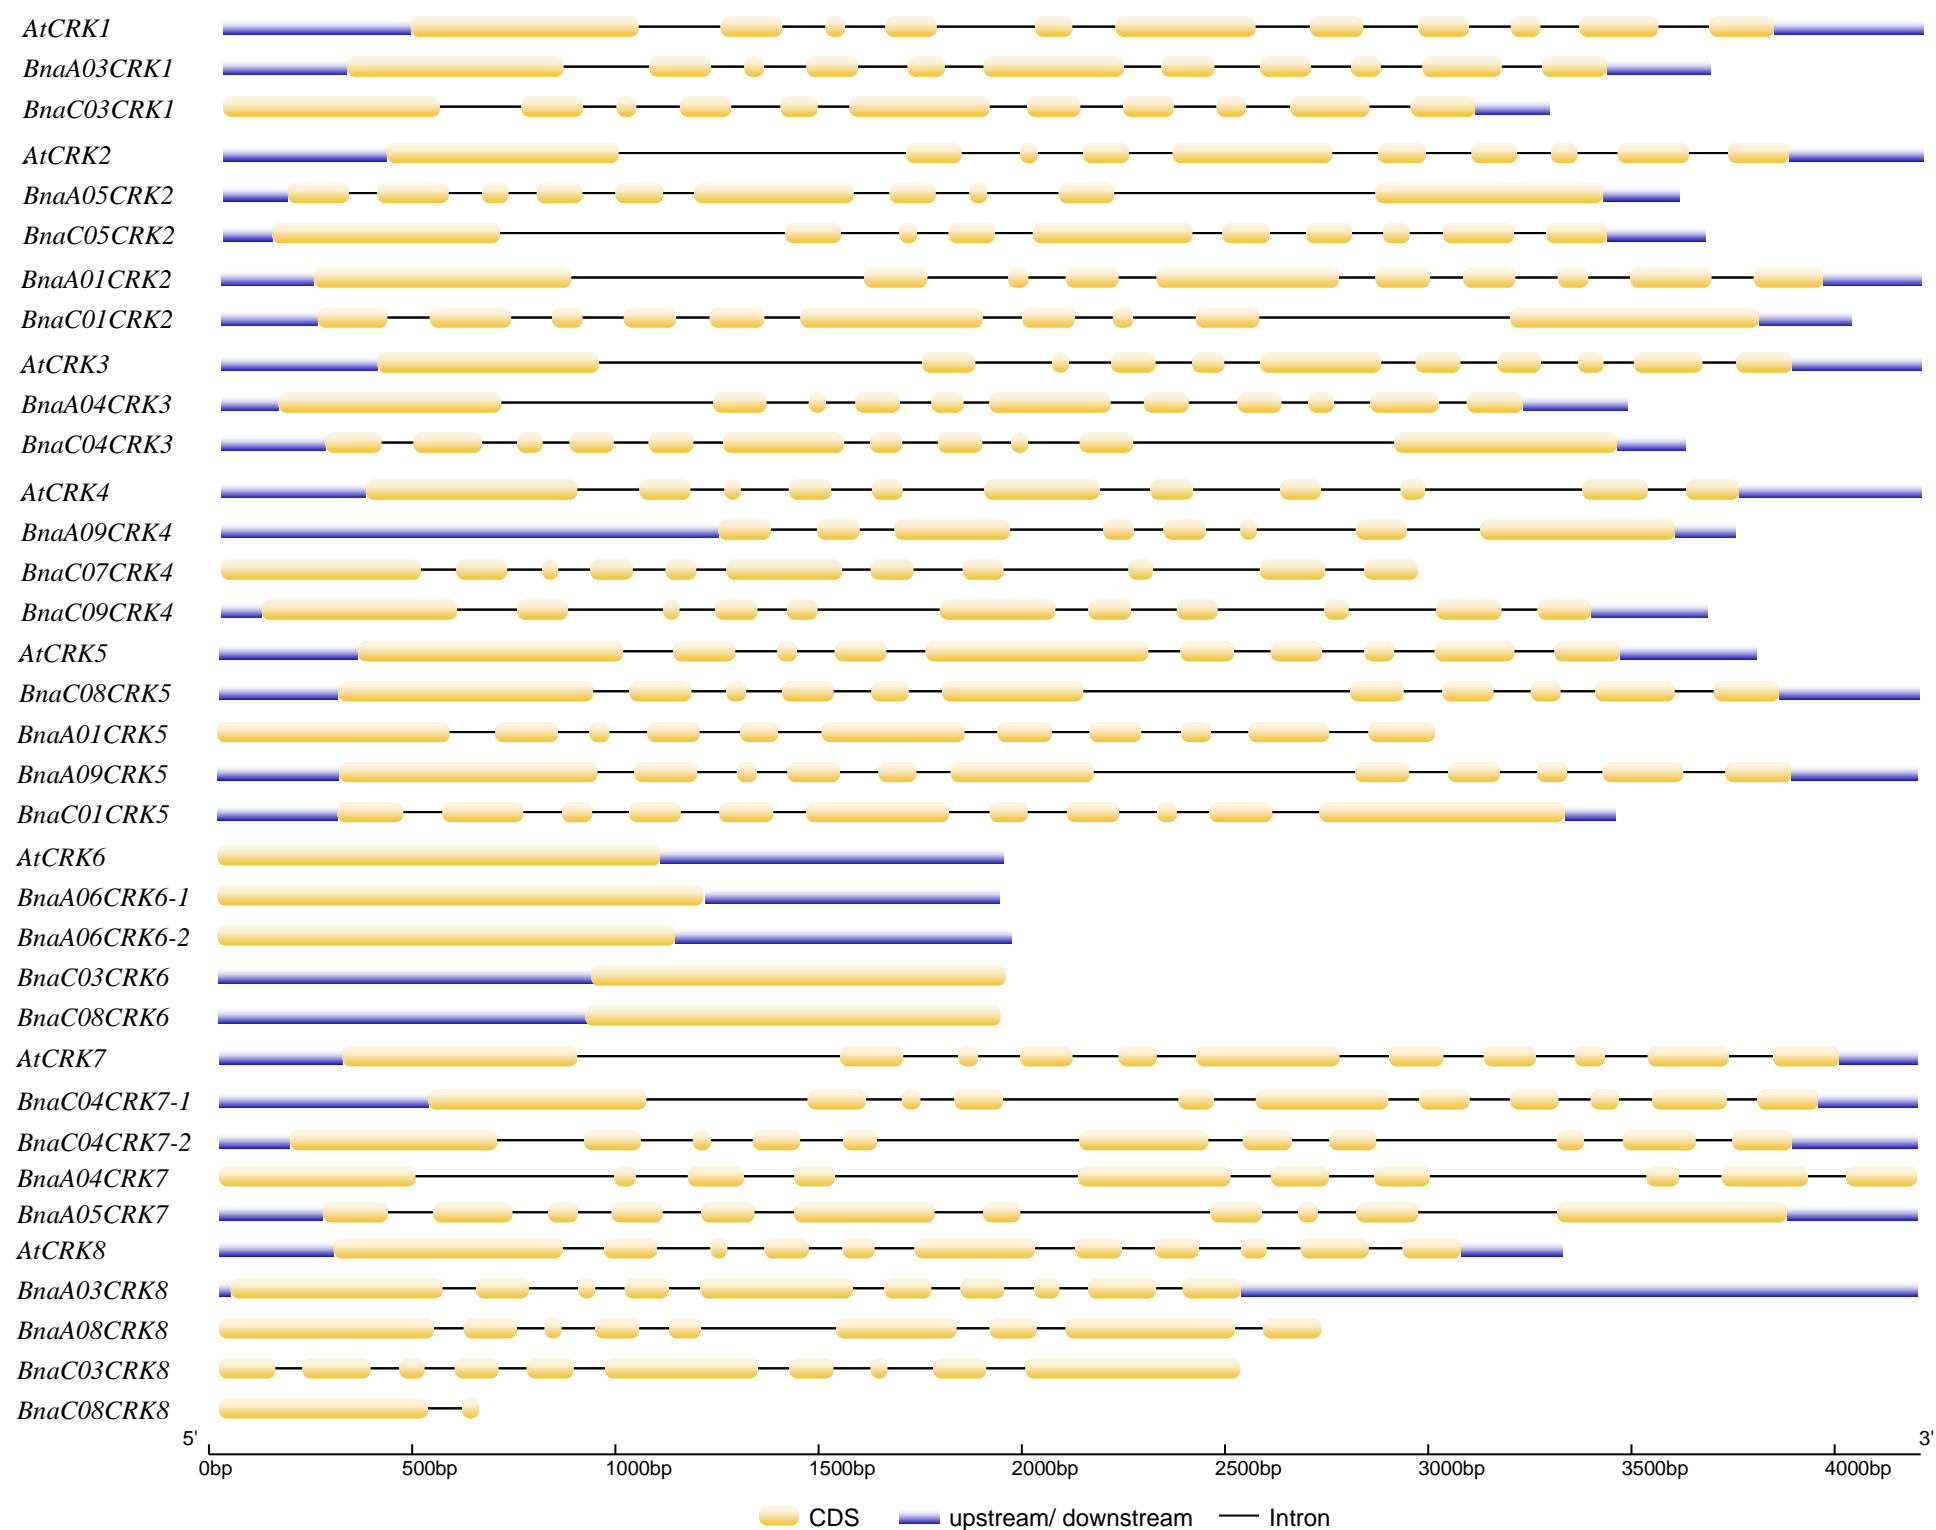

**Fig. S1.** Distribution of the exon and intron of the *CRK* gene family in *B. napus*. The yellow round block and thin black line indicate exon and intron.

The Y-axis displays each group of *BnaCRKs*, while the X-axis represents the length of the exons and introns.
