# Supplementary material for: Functional Characterization of the Cystine-Rich-Receptor-like Kinases (CRKs) and Their Expression Response to Sclerotinia sclerotiorum and Abiotic Stresses in Brassica napus
Source: MDPI journal article supplement (doi:10.3390/ijms24010511), 2022-12-28
Supplement: s1 [file s1]

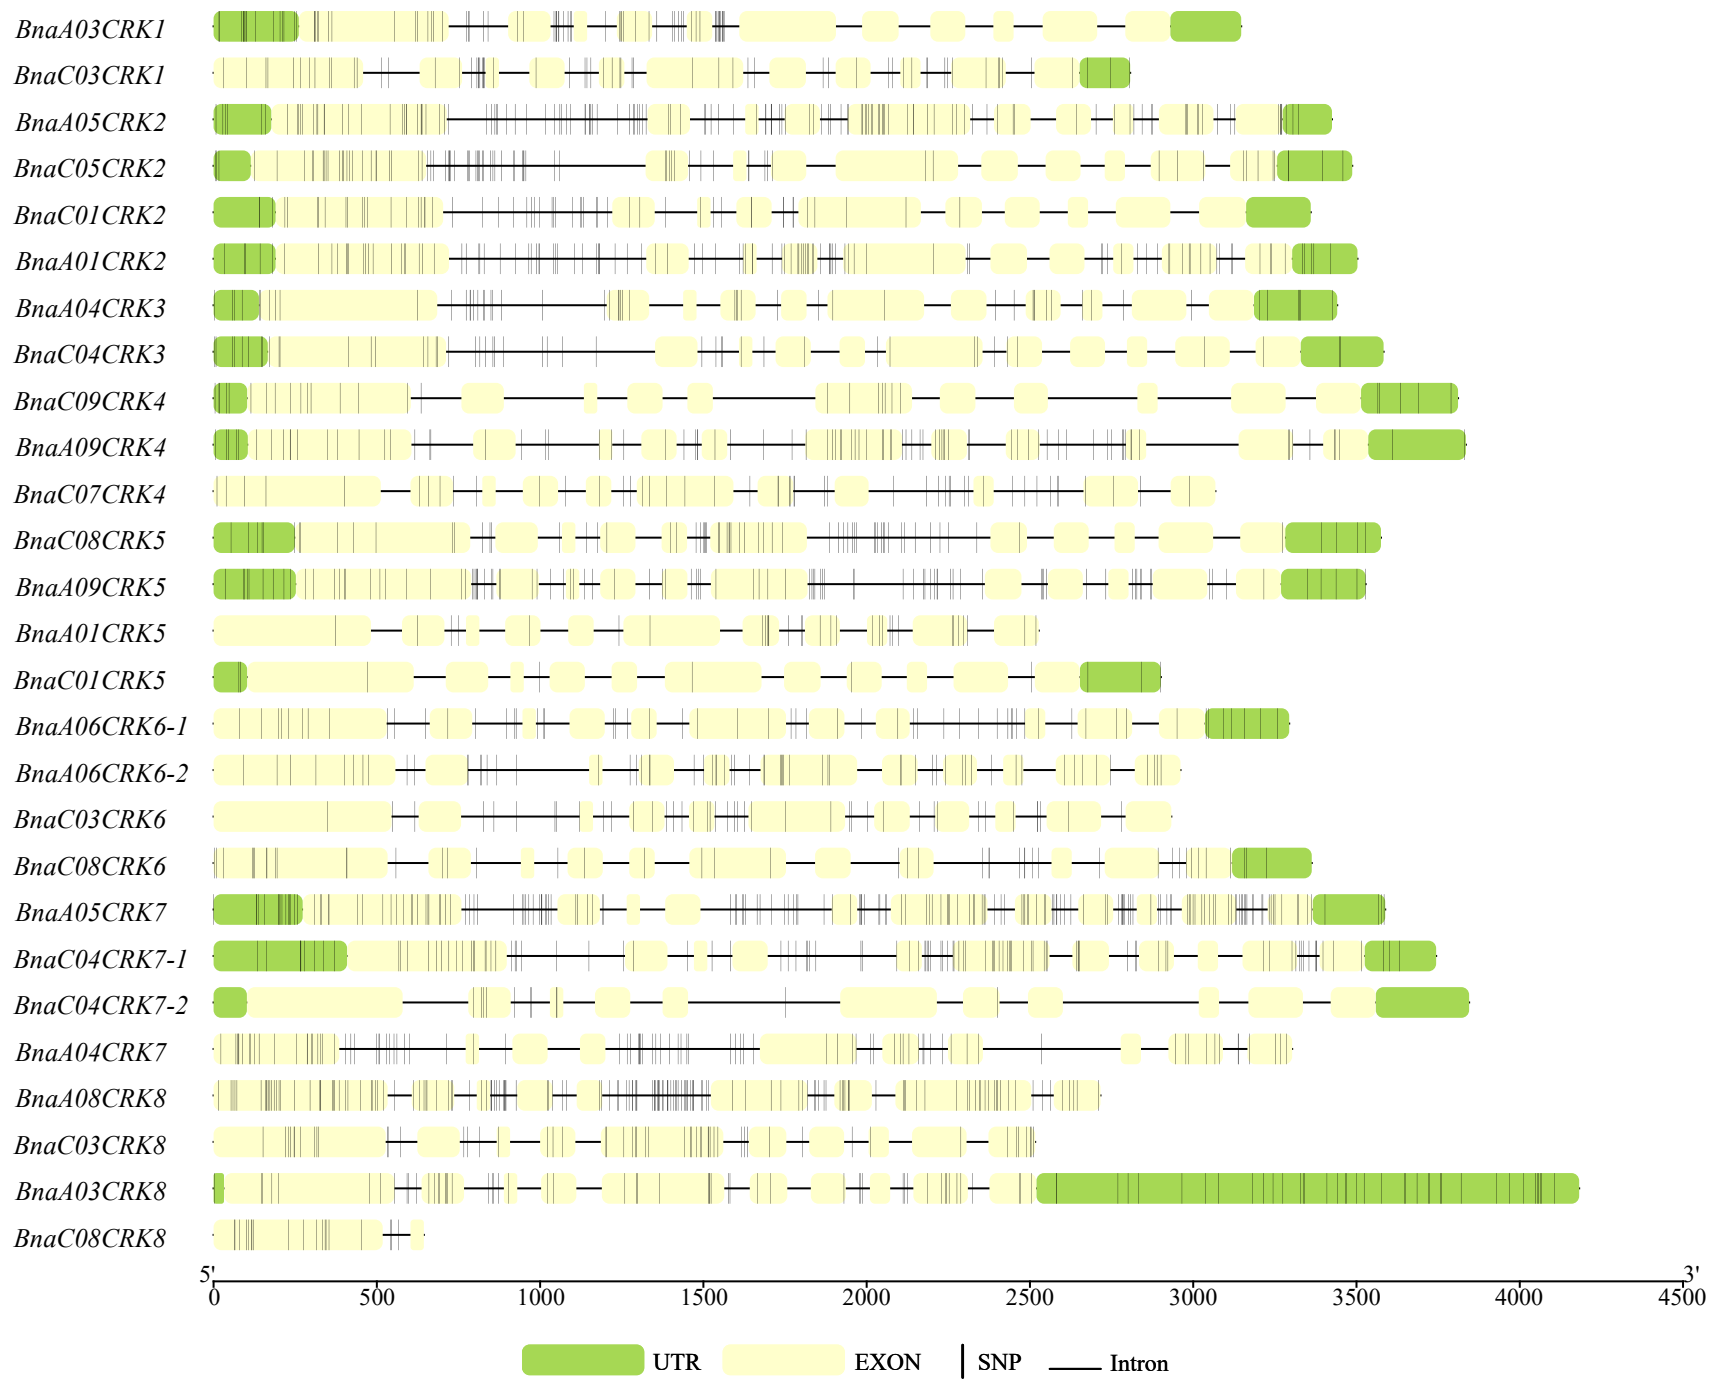

**Fig. S7.** Single nucleotide polymorphisms (SNPs) frequency on the *BnaCRKs* gene structure. The pale yellow colored block indicates the exon, while the thin black short lines on the top represents the SNPs.
