# Supplementary material for: Functional Characterization of the Cystine-Rich-Receptor-like Kinases (CRKs) and Their Expression Response to Sclerotinia sclerotiorum and Abiotic Stresses in Brassica napus
Source: MDPI journal article supplement (doi:10.3390/ijms24010511), 2022-12-28
Supplement: s1 [file s1]

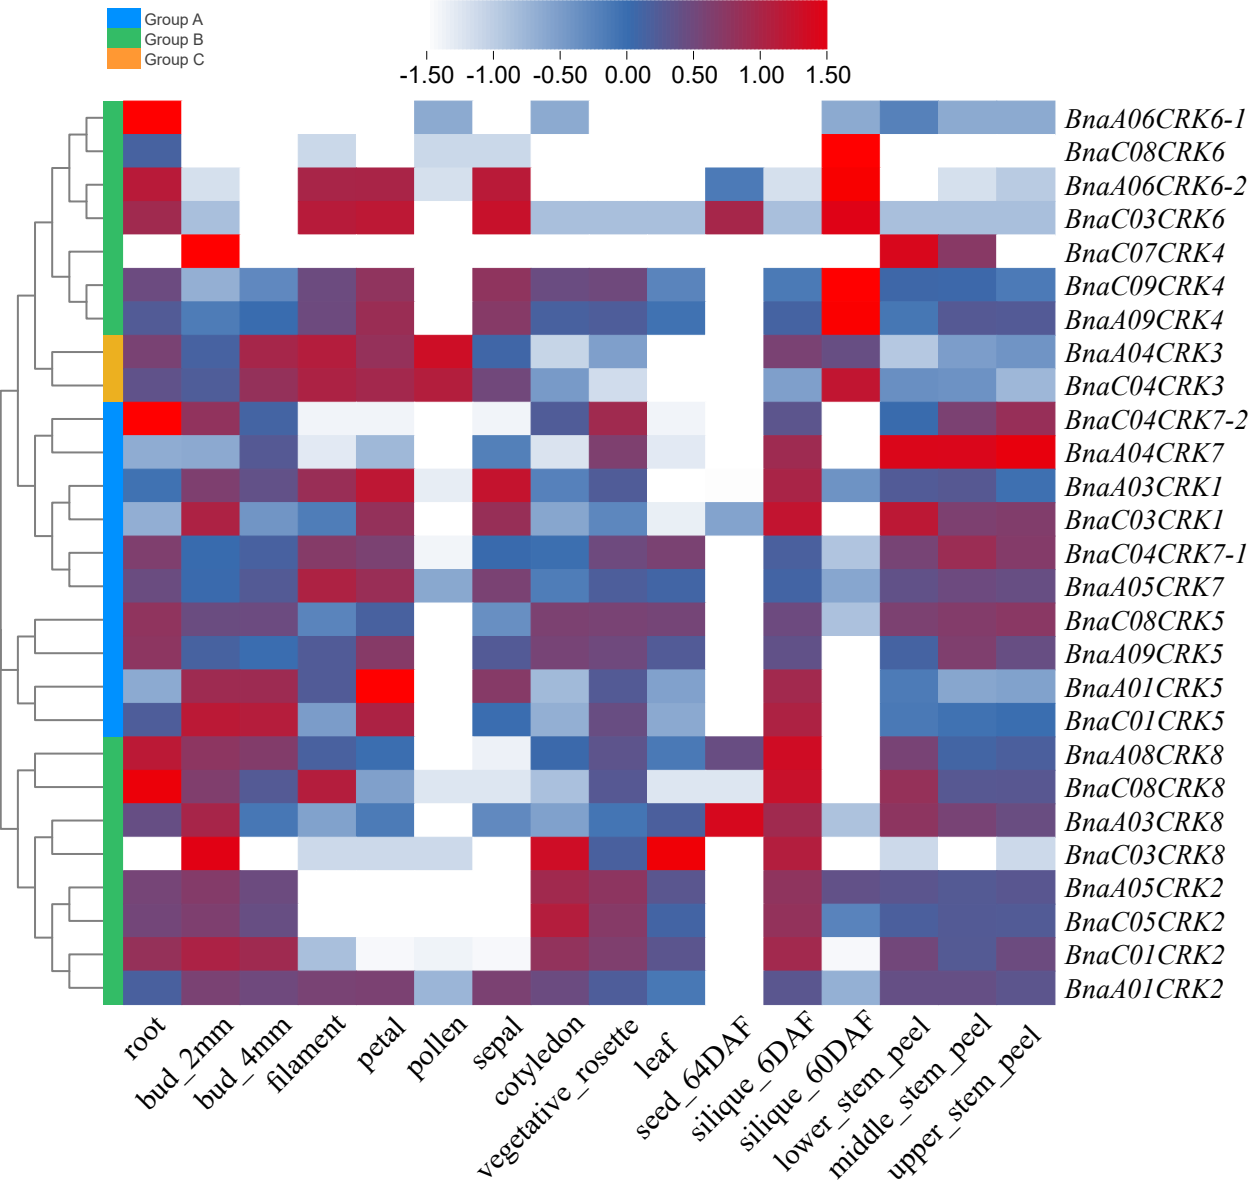

**Fig. S5.** Heatmap of the *BnaCRKs* expression in root, bud, filament, petal, pollen, sepal, cotyledon, vegetative rosette, leaf, seed, silique, and stem tissues. The different groups of *BnaCRKs* are highlighted in dissimilar colors. The normalized log2 values are listed in Table S7.
