# Supplementary material for: Functional Characterization of the Cystine-Rich-Receptor-like Kinases (CRKs) and Their Expression Response to Sclerotinia sclerotiorum and Abiotic Stresses in Brassica napus
Source: MDPI journal article supplement (doi:10.3390/ijms24010511), 2022-12-28
Supplement: s1 [file s1]

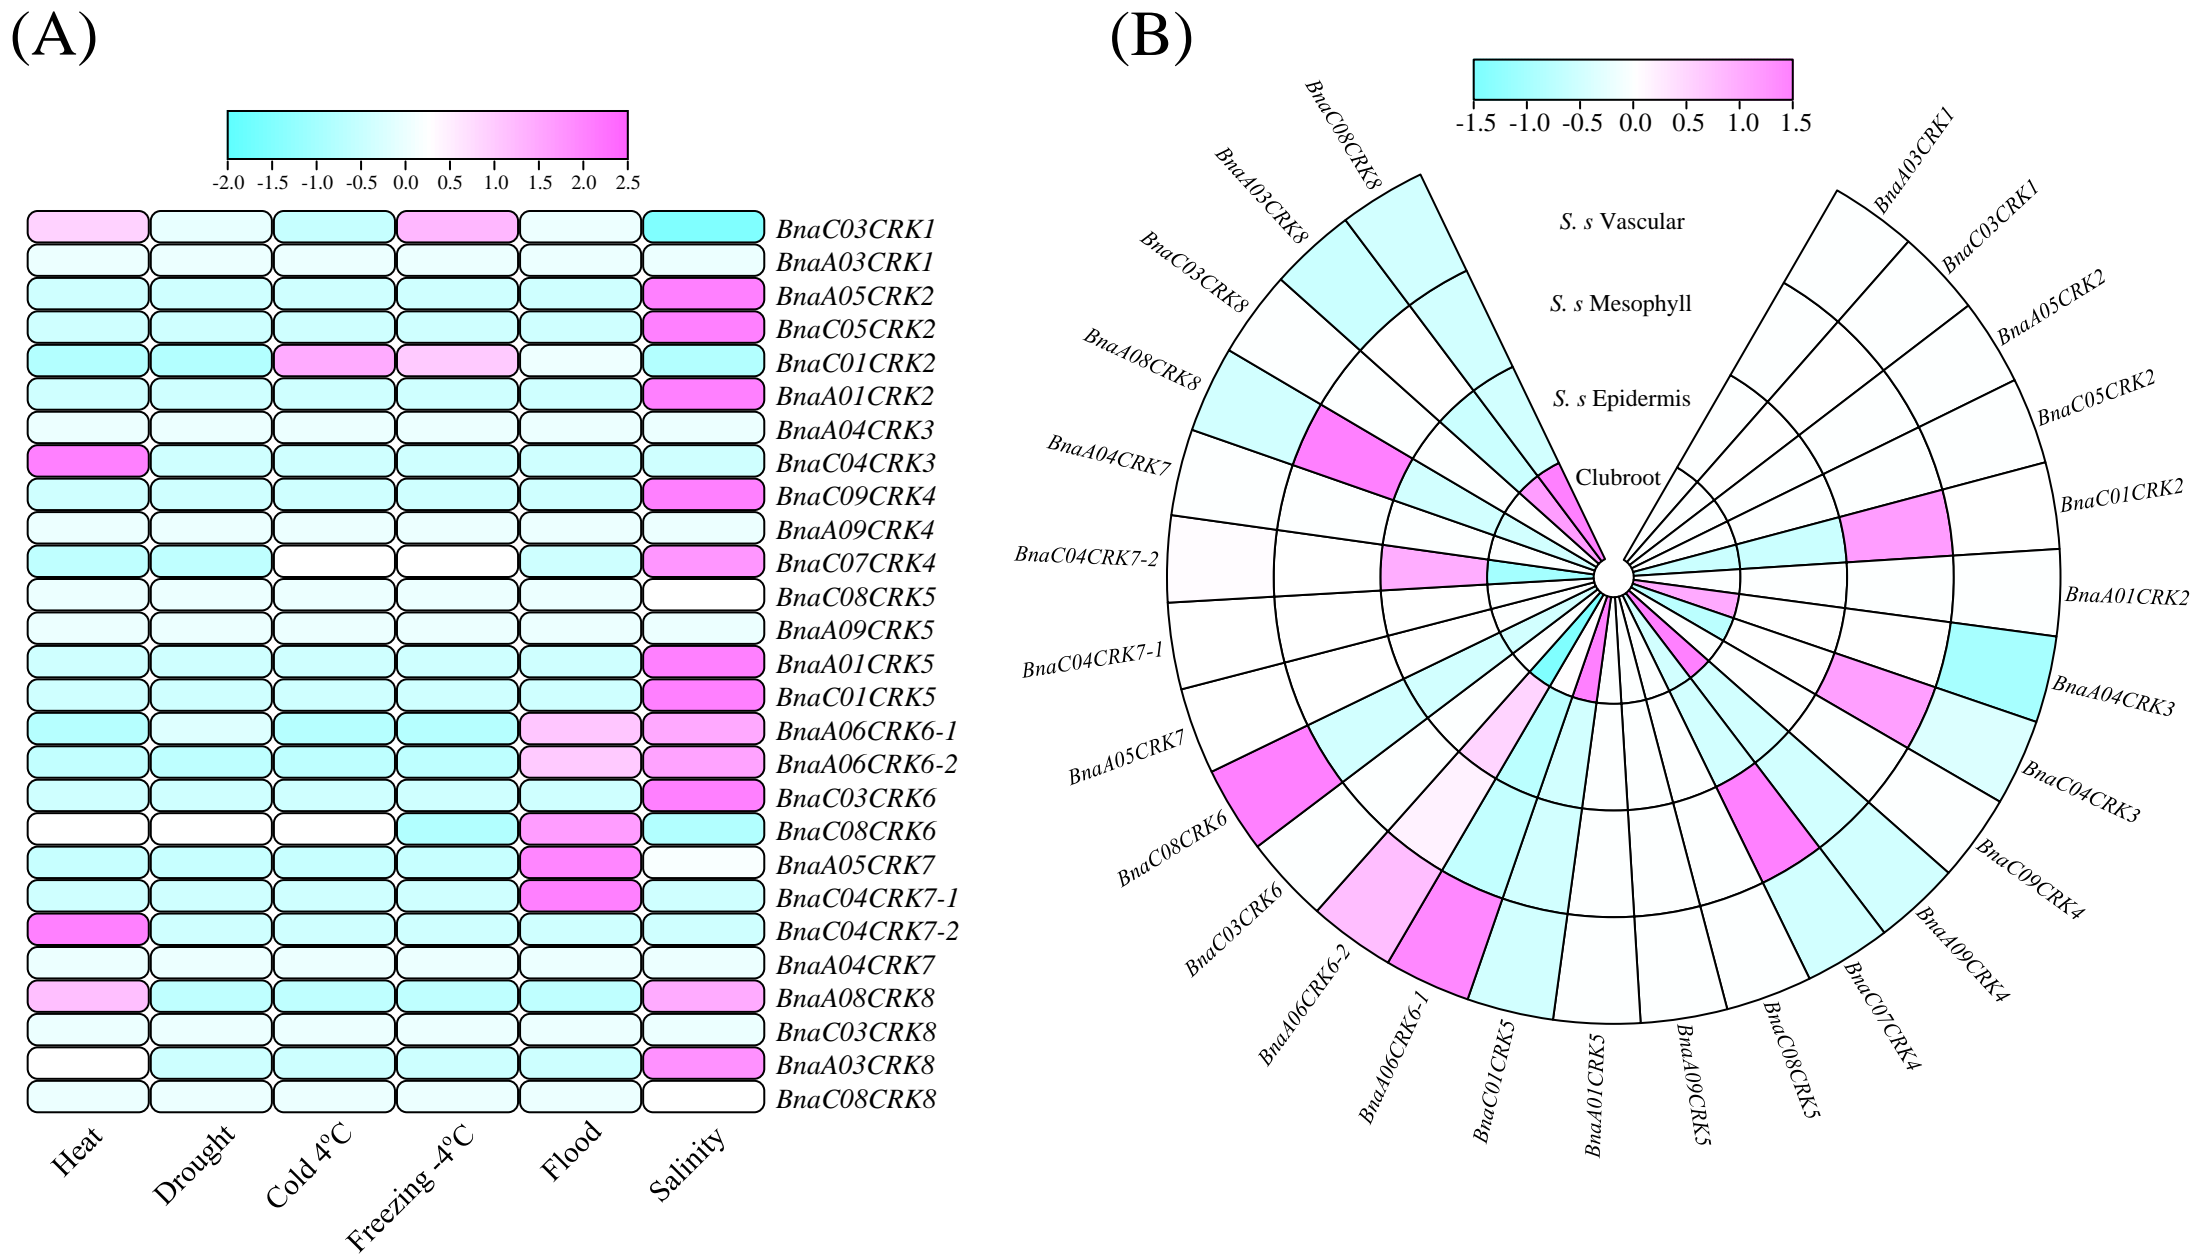

**Fig. S6.** Transcriptomic data of *BnaCRKs*. **(A)** *BnaCRKs* expression profile in response to heat, drought, cold, freezing, salinity and flood. **(B)** *BnaCRKs* expression profile in response to *S. s* (*Sclerotinia sclerotiorum*) and clubroot. The expression data was normalized by Log2 method and the values are listed in Table S9.1. The color bar shows the expression level ranging from lower to higher.
