# Supplementary material for: Functional Characterization of the Cystine-Rich-Receptor-like Kinases (CRKs) and Their Expression Response to Sclerotinia sclerotiorum and Abiotic Stresses in Brassica napus
Source: Int J Mol Sci. 2022 Dec 28;24(1):511. doi: 10.3390/ijms24010511 (PMC9820174; doi:10.3390/ijms24010511)
Supplement: Supplementary file 1 [file ijms-24-00511-s001.zip › Supplymentry Tables .xlsx]

## Sheet: Table S1
Table S1. Characterization and physiochemical properties of BnaCRKs
Gene Symbol	Gene Name	Gene locus id	Chromosome Number	Location			Protein							Myristoylation sites	Arabidopsis orthologs
				Start	End	Orentation	ORF	AA	pI	Mv (Da)	GRAVY	II	AI
BnaCRK1	BnaA03CRK1	BnaA03G0201000ZS	scaffoldA03	10468670	10471817	Forword	1707	568	8.84	63551.3	-0.218	47.53	86.18	No	AT2G41140 (AtCRK1)
	BnaC03CRK1	BnaC03G0237400ZS	scaffoldC03	14427203	14430010	Forword	1708	568	8.84	63452.2	-0.204	45.9	86.88	No
BnaCRK2	BnaA05CRK2	BnaA05G0368300ZS	scaffoldA05	37066112	37069537	Reverced	1791	596	9.14	66816.6	-0.376	51.42	82.82	Yes	AT3G19100 (AtCRK2)
	BnaC05CRK2	BnaC05G0404800ZS	scaffoldC05	45803513	45807000	Reverced	1791	596	9.09	66913.8	-0.362	50.31	83.79	Yes
	BnaC01CRK2	BnaC01G0398600ZS	scaffoldC01	46223295	46226655	Reverced	1767	588	9.18	65992.7	-0.339	49.6	84.95	Yes
	BnaA01CRK2	BnaA01G0322300ZS	scaffoldA01	29866097	29869600	Reverced	1785	594	9.06	66743.4	-0.374	51.69	83.43	Yes
BnaCRK3	BnaA04CRK3	BnaA04G0294600ZS	scaffoldA04	25299734	25303175	Reverced	1791	596	8.95	66441	-0.351	48.47	83.98	Yes	AT2G46700 (AtCRK3)
	BnaC04CRK3	BnaC04G0612200ZS	scaffoldC04	70741123	70744706	Reverced	1791	596	8.95	66470.1	-0.356	48.39	83.49	No
BnaCRK4	BnaC09CRK4	BnaC09G0057800ZS	scaffoldC09	3747760	3751571	Forword	1743	580	8.98	65060.6	-0.365	51.9	81.38	Yes	AT5G24430 (AtCRK4)
	BnaA09CRK4	BnaA09G0067800ZS	scaffoldA09	4077223	4081105	Forword	1404	467	9.33	52367.3	-0.345	52.41	82.68	Yes
	BnaC07CRK4	BnaC07G0365000ZS	scaffoldC07	49271391	49274459	Forword	1755	584	8.85	65331.6	-0.342	50.71	80.89	Yes
BnaCRK5	BnaC08CRK5	BnaC08G0307300ZS	scaffoldC08	39256161	39259736	Forword	1785	594	8.87	66234.7	-0.337	48.8	82.31	No	AT3G50530 (AtCRK5)
	BnaA09CRK5	BnaA09G0471500ZS	scaffoldA09	52033394	52036922	Forword	1785	594	8.84	66144.6	-0.321	47.67	82.47	No
	BnaA01CRK5	BnaA01G0212100ZS	scaffoldA01	13450457	13452984	Reverced	1731	576	9.01	64475	-0.318	47.5	83.68	Yes
	BnaC01CRK5	BnaC01G0266400ZS	scaffoldC01	21756093	21758994	Reverced	1758	585	8.79	65362.7	-0.346	45.95	81.9	Yes
BnaCRK6	BnaA06CRK6-1	BnaA06G0159600ZS	scaffoldA06	9747063	9750357	Forword	1776	591	8.66	65936.3	-0.314	51.29	83.55	Yes	AT3G49370 (AtCRK6)
	BnaA06CRK6-2	BnaA06G0269200ZS	scaffoldA06	37041355	37044316	Reverced	1803	600	8.51	66930.3	-0.343	49.22	82.48	Yes
	BnaC03CRK6	BnaC03G0564200ZS	scaffoldC03	43217409	43220342	Forword	1791	596	8.65	66692.1	-0.336	48.76	83.04	Yes
	BnaC08CRK6	BnaC08G0296700ZS	scaffoldC08	38122380	38125743	Reverced	1779	592	8.66	66229.6	-0.328	49.31	83.58	Yes
BnaCRK7	BnaA05CRK7	BnaA05G0022100ZS	scaffoldA05	1352595	1356183	Forword	1734	577	8.52	64392.1	-0.255	52.32	84.85	No	AT3G56760 (AtCRK7)
	BnaC04CRK7-1	BnaC04G0023800ZS	scaffoldC04	2303180	2306924	Forword	1737	578	8.52	64467.2	-0.256	51.54	84.71	No
	BnaC04CRK7-2	BnaC04G0305600ZS	scaffoldC04	41358524	41362369	Forword	1725	574	8.52	64260.9	-0.261	48.36	86.64	No
	BnaA04CRK7	BnaA04G0034200ZS	scaffoldA04	2246567	2249870	Forword	1503	500	8.68	56076.4	-0.254	50.19	86.42	No
BnaCRK8	BnaA08CRK8	BnaA08G0030900ZS	scaffoldA08	2540372	2543088	Reverced	1869	622	8.94	69742.7	-0.322	50.61	83.46	Yes	AT1G49580 (AtCRK8)
	BnaC03CRK8	BnaC03G0434500ZS	scaffoldC03	30177780	30180296	Forword	1785	594	7.97	66225.2	-0.228	49.8	91.46	Yes
	BnaA03CRK8	BnaA03G0356800ZS	scaffoldA03	18991647	18995829	Forword	1779	592	8.24	66236.9	-0.255	49.55	88.46	Yes
	BnaC08CRK8	BnaC08G0037300ZS	scaffoldC08	3087757	3088401	Reverced	561	186	10.16	20424.2	-0.82	69.42	53.6	Yes

## Sheet: Table S2
Table S2. Sequence similarity prediction among B. napus and A. thaliana CRK genes
AtCRK1	AtCRK2	AtCRK3	AtCRK4	AtCRK5	AtCRK6	AtCRK7	AtCRK8	BnaA01CRK2	BnaA01CRK5	BnaA03CRK1	BnaA03CRK8	BnaA04CRK3	BnaA04CRK7	BnaA05CRK2	BnaA05CRK7	BnaA06CRK6-1	BnaA06CRK6-2	BnaA08CRK8	BnaA09CRK5	BnaA09CRK4	BnaC01CRK2	BnaC01CRK5	BnaC03CRK1	BnaC03CRK6	BnaC03CRK8	BnaC04CRK3	BnaC04CRK7-1	BnaC04CRK7-2	BnaC05CRK2	BnaC07CRK4	BnaC08CRK5	BnaC08CRK6	BnaC08CRK8	BnaC09CRK4
	58.5	54.5	50.4	70	49.9	91.6	60.7	37	39.8	45.3	37.2	34.7	39.6	37.1	44.9	34.2	33.3	36.2	36.8	39.1	37.5	39.5	45.8	33.6	37.2	34.4	45.3	44.3	37.1	35.1	39.1	33.9	33.6	35.7	AtCRK1
		51	50	62.8	50	59.4	80.5	41	34.7	33.8	40.7	31.3	31.3	41.2	33.7	32.4	31.8	38.2	34.2	34.3	40.9	34.5	34.6	32	40.4	31.1	33.6	33.4	41.2	32.3	34.3	32	31.5	32.8	AtCRK2
			56.6	51.2	55	54.1	51.9	34.6	34.2	34.3	34	41.6	31.2	34.3	34.2	33.8	33.5	33.2	36.3	34.1	34.5	33.9	34.5	33.5	34	41.8	34.1	33.7	34	35.1	34.1	33	22.9	36.2	AtCRK3
				52.1	83.8	50.7	47.8	34.2	34.5	35.2	34.1	34.9	31.2	33.4	35	43.4	44.3	34.4	44.8	33.9	34.4	34.5	35.5	44.3	33.6	34.9	34.9	33.7	33.2	44.9	33.9	43.5	26.7	46.2	AtCRK4
					51.8	69.3	64.8	35.4	42.2	35.8	35.9	30	30.2	36	35.2	31.2	31.4	34.5	32.6	41	35.3	42	35.8	31.4	36.1	30	35.1	33.7	35.7	31.7	41.2	31.2	29.4	32.3	AtCRK5
						50.6	48	35.6	35.2	35.3	36.6	35.5	30.8	35.3	35.4	45.2	45.4	35.3	44.7	34.8	36.1	35.2	35.3	45.4	35.3	35.5	35.1	34.1	34.6	43.9	34.8	45.4	30.1	45.5	AtCRK6
							61.2	37.2	39.2	43.6	37.7	34.1	40.1	37.3	44	33.3	32.2	35.8	36.2	38.2	37.7	38.9	44.1	32.4	37.7	33.8	44.4	44.8	36.8	33.9	38.2	32.7	35.7	34.8	AtCRK7
								38.7	35.6	33.9	38.7	31.6	30.8	39.5	33.2	32	31.2	39.5	33.1	34.6	38.6	35.3	34.4	31.4	38.6	31.3	33.2	33.5	39.2	31.4	34.6	31.7	28.6	32.4	AtCRK8
									71.3	66.3	90.4	59.3	63.3	92.7	65.9	56.6	56.1	79.7	57.5	69.9	98	70.8	66.1	56.1	91	59.3	65.4	65.2	92.7	56.2	69.6	56.3	71	56.4	BnaA01CRK2
										72.2	70.8	62.8	69.9	71.2	72.2	59.6	59.5	69.1	62.4	95.1	70.7	97.7	72	59.7	70.8	63	71.7	71.2	70.8	59.1	94.6	59.7	56.7	60	BnaA01CRK5
											64.8	60.8	86.2	65	94.9	58.4	57.7	62.5	59.3	72.3	65.8	72.2	98.2	57.2	64.6	60.8	94.7	86.8	65.1	57.2	72.3	58.1	53.3	58.1	BnaA03CRK1
												57.9	62.3	90.8	65.3	56.9	55.9	77.8	57.6	69.6	89	70.3	64.9	56.1	95.8	57.9	64.6	64	90.3	54.4	69.3	56.6	71.2	55.7	BnaA03CRK8
													57.2	59.9	59.6	62.3	62.8	59.1	64.8	62.7	59.1	62.7	60.4	62.8	58.3	99	59.5	58.8	60.1	62.3	62.7	61.8	46.7	64.2	BnaA04CRK3
														62	89	55.1	55.2	58.6	57.8	69.1	63.6	69.5	86	54.8	62.3	57.4	88.6	95.6	61.8	54.7	68.9	55.2	43.3	55.6	BnaA04CRK7
															64.6	57.1	56.3	79.6	57.7	69.7	91.5	70.7	65.1	56.1	92.5	59.9	64	64.5	98.8	55.9	69.4	56.8	71.4	56.4	BnaA05CRK2
																57.7	57.4	63	59.6	71.7	66	71.9	94.5	56.9	65.1	59.6	99.1	88.5	64.3	56.7	71.7	57.4	55	58.2	BnaA05CRK7
																	93.9	55.9	84.7	59.5	56.5	59.5	57.8	93.2	56.5	62.3	57.6	56.2	56.7	83	59.7	97.8	47.3	84.9	BnaA06CRK6-1
																		55.7	85.9	59.4	56.1	59.4	57.4	99	55.6	63	57.1	56.1	55.9	84.7	59.6	93.6	47.1	86.6	BnaA06CRK6-2
																			56.7	67.7	80.2	69.2	62.7	55.7	78.4	59.1	62.7	61.1	79.4	54.9	67.5	55.7	97.8	55.5	BnaA08CRK8
																				62.4	57.5	62.3	58.9	85.2	57.1	64.8	59.3	59	57.3	88.1	62.8	84.3	47	97	BnaA09CRK4
																					69.4	94.3	72.1	59.8	69.2	62.9	71.2	70.5	69.4	59.3	98.8	59.6	53.1	60.2	BnaA09CRK5
																						70	66	56.1	89.9	59.1	65.6	65	91.5	56	69	56.3	72.6	56.4	BnaC01CRK2
																							72.2	59.6	70.1	62.9	71.4	70.8	70.3	59.1	94.2	59.4	56.3	59.9	BnaC01CRK5
																								56.8	64.9	60.4	94.4	86.8	65.3	56.8	72.1	57.6	53.3	57.7	BnaC03CRK1
																									55.7	63	56.6	55.6	55.7	84.6	60	92.9	47.1	86	BnaC03CRK6
																										58.3	64.4	64.2	92	54.4	68.8	56.3	71.5	55.3	BnaC03CRK8
																											59.5	59	60.1	62.3	62.9	61.8	46.7	64.2	BnaC04CRK3
																												88.3	63.8	56.6	71.2	57.3	54.7	57.9	BnaC04CRK7-1
																													64.1	55.7	70.7	55.9	50.6	56.9	BnaC04CRK7-2
																														55.5	69	56.4	70.3	56.1	BnaC05CRK2
																															59.3	82.5	47	89.2	BnaC07CRK4
																																59.8	53.7	60.5	BnaC08CRK5
																																	45.9	84.8	BnaC08CRK6
																																		47	BnaC08CRK8
																																			BnaC09CRK4

## Sheet: Table S3
Table S3. BnaCRKs synteny relationship among A. thaliana, B.oleracea, B. rapa, and B. nigra
B. napus/A. thaliana				B. napus/B. oleracea				B. napus/B. rapa				B. napus/B. nigra
Locus_ID		Gene_ID		Locus_ID		Gene_ID		Locus_ID		Gene_ID		Locus_ID		Gene_ID
Brassica napus	Arabidopsis thaliana	Brassica napus	Arabidopsis thaliana	Brassica napus	Brassica oleracea	Brassica napus	Brassica oleracea	Brassica napus	Brassica rapa	Brassica napus	Brassica rapa	Brassica napus	Brassica nigra	Brassica napus	Brassica nigra
scaffoldC04	Chr2	BnaC04CRK7-1	AT2G41140 (AtCRK1)	scaffoldC01	C1	BnaC01CRK2	XM_013753025.1	scaffoldC01	A01	BnaC01CRK2	Bra037539.1	scaffoldC01	B1	BnaC01CRK2	BniB01g045200
scaffoldC04	Chr2	BnaC04CRK7-2	AT2G41140 (AtCRK1)	scaffoldC08	C1	BnaC08CRK8	XM_013753025.1	scaffoldC08	A01	BnaC08CRK8	Bra037539.1	scaffoldC08	B1	BnaC08CRK8	BniB01g045200
scaffoldA04	Chr2	BnaA04CRK7	AT2G41140 (AtCRK1)	scaffoldC05	C1	BnaC05CRK2	XM_013753025.1	scaffoldC05	A01	BnaC05CRK2	Bra037539.1	scaffoldC05	B1	BnaC05CRK2	BniB01g045200
scaffoldA03	Chr2	BnaA03CRK1	AT2G41140 (AtCRK1)	scaffoldC03	C1	BnaC03CRK8	XM_013753025.1	scaffoldC03	A01	BnaC03CRK8	Bra037539.1	scaffoldC03	B1	BnaC03CRK8	BniB01g045200
scaffoldA05	Chr2	BnaA05CRK7	AT2G41140 (AtCRK1)	scaffoldA03	C1	BnaA03CRK8	XM_013753025.1	scaffoldA03	A01	BnaA03CRK8	Bra037539.1	scaffoldA03	B1	BnaA03CRK8	BniB01g045200
scaffoldC01	Chr3	BnaC01CRK2	AT3G19100 (AtCRK2)	scaffoldA01	C1	BnaA01CRK2	XM_013753025.1	scaffoldA01	A01	BnaA01CRK2	Bra037539.1	scaffoldA01	B1	BnaA01CRK2	BniB01g045200
scaffoldC08	Chr3	BnaC08CRK8	AT3G19100 (AtCRK2)	scaffoldA08	C1	BnaA08CRK8	XM_013753025.1	scaffoldA08	A01	BnaA08CRK8	Bra037539.1	scaffoldA08	B1	BnaA08CRK8	BniB01g045200
scaffoldC03	Chr3	BnaC03CRK8	AT3G19100 (AtCRK2)	scaffoldA05	C1	BnaA05CRK2	XM_013753025.1	scaffoldA05	A01	BnaA05CRK2	Bra037539.1	scaffoldA05	B1	BnaA05CRK2	BniB01g045200
scaffoldA03	Chr3	BnaA03CRK8	AT3G19100 (AtCRK2)	scaffoldC01	C1	BnaC01CRK5	XM_013752625.1	scaffoldC01	A03	BnaC01CRK2	Bra001734.1	scaffoldC01	B5	BnaC01CRK5	BniB05g047040
scaffoldA01	Chr3	BnaA01CRK2	AT3G19100 (AtCRK2)	scaffoldC08	C1	BnaC08CRK5	XM_013752625.1	scaffoldC08	A03	BnaC08CRK8	Bra001734.1	scaffoldC08	B5	BnaC08CRK5	BniB05g047040
scaffoldA08	Chr3	BnaA08CRK8	AT3G19100 (AtCRK2)	scaffoldA01	C1	BnaA01CRK5	XM_013752625.1	scaffoldC05	A03	BnaC05CRK2	Bra001734.1	scaffoldA01	B5	BnaA01CRK5	BniB05g047040
scaffoldA05	Chr3	BnaA05CRK2	AT3G19100 (AtCRK2)	scaffoldA09	C1	BnaA09CRK5	XM_013752625.1	scaffoldC03	A03	BnaC03CRK8	Bra001734.1	scaffoldA09	B5	BnaA09CRK5	BniB05g047040
scaffoldC05	Chr3	BnaC05CRK2	AT3G19100 (AtCRK2)	scaffoldC01	C2	BnaC01CRK2	XM_013773983.1	scaffoldA03	A03	BnaA03CRK8	Bra001734.1	scaffoldC01	B7	BnaC01CRK2	BniB07g051450
scaffoldC04	Chr2	BnaC04CRK3	AT2G46700 (AtCRK3)	scaffoldC08	C2	BnaC08CRK8	XM_013773983.1	scaffoldA01	A03	BnaA01CRK2	Bra001734.1	scaffoldC08	B7	BnaC08CRK8	BniB07g051450
scaffoldA04	Chr2	BnaA04CRK3	AT2G46700 (AtCRK3)	scaffoldC05	C2	BnaC05CRK2	XM_013773983.1	scaffoldA08	A03	BnaA08CRK8	Bra001734.1	scaffoldC05	B7	BnaC05CRK2	BniB07g051450
scaffoldC09	Chr5	BnaC09CRK4	AT5G24430 (AtCRK4)	scaffoldC03	C2	BnaC03CRK8	XM_013773983.1	scaffoldA05	A03	BnaA05CRK2	Bra001734.1	scaffoldC03	B7	BnaC03CRK8	BniB07g051450
scaffoldC08	Chr5	BnaC08CRK6	AT5G24430 (AtCRK4)	scaffoldA03	C2	BnaA03CRK8	XM_013773983.1	scaffoldC01	A05	BnaC01CRK2	Bra022388.1	scaffoldA03	B7	BnaA03CRK8	BniB07g051450
scaffoldA09	Chr5	BnaA09CRK4	AT5G24430 (AtCRK4)	scaffoldA01	C2	BnaA01CRK2	XM_013773983.1	scaffoldC08	A05	BnaC08CRK8	Bra022388.1	scaffoldA01	B7	BnaA01CRK2	BniB07g051450
scaffoldA06	Chr5	BnaA06CRK6-1	AT5G24430 (AtCRK4)	scaffoldA08	C2	BnaA08CRK8	XM_013773983.1	scaffoldC05	A05	BnaC05CRK2	Bra022388.1	scaffoldA08	B7	BnaA08CRK8	BniB07g051450
scaffoldC07	Chr5	BnaC07CRK4	AT5G24430 (AtCRK4)	scaffoldA05	C2	BnaA05CRK2	XM_013773983.1	scaffoldC03	A05	BnaC03CRK8	Bra022388.1	scaffoldA05	B7	BnaA05CRK2	BniB07g051450
scaffoldC01	Chr3	BnaC01CRK5	AT3G50530 (AtCRK5)	scaffoldC01	C5	BnaC01CRK2	XM_013732238.1	scaffoldA03	A05	BnaA03CRK8	Bra022388.1	scaffoldC01	B7	BnaC01CRK2	BniB07g006130
scaffoldA01	Chr3	BnaA01CRK5	AT3G50530 (AtCRK5)	scaffoldC08	C5	BnaC08CRK8	XM_013732238.1	scaffoldA01	A05	BnaA01CRK2	Bra022388.1	scaffoldC08	B7	BnaC08CRK8	BniB07g006130
scaffoldA09	Chr3	BnaA09CRK5	AT3G50530 (AtCRK5)	scaffoldC05	C5	BnaC05CRK2	XM_013732238.1	scaffoldA08	A05	BnaA08CRK8	Bra022388.1	scaffoldC05	B7	BnaC05CRK2	BniB07g006130
scaffoldC08	Chr3	BnaC08CRK5	AT3G50530 (AtCRK5)	scaffoldC03	C5	BnaC03CRK8	XM_013732238.1	scaffoldA05	A05	BnaA05CRK2	Bra022388.1	scaffoldC03	B7	BnaC03CRK8	BniB07g006130
scaffoldC07	Chr3	BnaC07CRK4	AT3G49370 (AtCRK6)	scaffoldA03	C5	BnaA03CRK8	XM_013732238.1	scaffoldC01	A08	BnaC01CRK2	Bra014201.1	scaffoldA03	B7	BnaA03CRK8	BniB07g006130
scaffoldC03	Chr3	BnaC03CRK6	AT3G49370 (AtCRK6)	scaffoldA01	C5	BnaA01CRK2	XM_013732238.1	scaffoldC08	A08	BnaC08CRK8	Bra014201.1	scaffoldA01	B7	BnaA01CRK2	BniB07g006130
scaffoldA06	Chr3	BnaA06CRK6-2	AT3G49370 (AtCRK6)	scaffoldA08	C5	BnaA08CRK8	XM_013732238.1	scaffoldC05	A08	BnaC05CRK2	Bra014201.1	scaffoldA08	B7	BnaA08CRK8	BniB07g006130
scaffoldA06	Chr3	BnaA06CRK6-1	AT3G49370 (AtCRK6)	scaffoldA05	C5	BnaA05CRK2	XM_013732238.1	scaffoldC03	A08	BnaC03CRK8	Bra014201.1	scaffoldA05	B7	BnaA05CRK2	BniB07g006130
scaffoldC08	Chr3	BnaC08CRK6	AT3G49370 (AtCRK6)	scaffoldC01	C8	BnaC01CRK2	XM_013744497.1	scaffoldA03	A08	BnaA03CRK8	Bra014201.1	scaffoldC01	B7	BnaC01CRK2	BniB07g030380
scaffoldC04	Chr3	BnaC04CRK7-2	AT3G56760 (AtCRK7)	scaffoldC08	C8	BnaC08CRK8	XM_013744497.1	scaffoldA01	A08	BnaA01CRK2	Bra014201.1	scaffoldA03	B7	BnaA03CRK8	BniB07g030380
scaffoldC04	Chr3	BnaC04CRK7-1	AT3G56760 (AtCRK7)	scaffoldC05	C8	BnaC05CRK2	XM_013744497.1	scaffoldA08	A08	BnaA08CRK8	Bra014201.1	scaffoldA01	B7	BnaA01CRK2	BniB07g030380
scaffoldA04	Chr3	BnaA04CRK7	AT3G56760 (AtCRK7)	scaffoldC03	C8	BnaC03CRK8	XM_013744497.1	scaffoldA05	A08	BnaA05CRK2	Bra014201.1	scaffoldA08	B7	BnaA08CRK8	BniB07g030380
scaffoldC01	Chr1	BnaC01CRK2	AT1G49580 (AtCRK8)	scaffoldA03	C8	BnaA03CRK8	XM_013744497.1	scaffoldC01	A09	BnaC01CRK5	Bra036089.1	scaffoldA05	B7	BnaA05CRK2	BniB07g030380
scaffoldC08	Chr1	BnaC08CRK8	AT1G49580 (AtCRK8)	scaffoldA01	C8	BnaA01CRK2	XM_013744497.1	scaffoldC08	A09	BnaC08CRK5	Bra036089.1	scaffoldC08	B7	BnaC08CRK8	BniB07g030380
scaffoldA03	Chr1	BnaA03CRK8	AT1G49580 (AtCRK8)	scaffoldA08	C8	BnaA08CRK8	XM_013744497.1	scaffoldA01	A09	BnaA01CRK5	Bra036089.1	scaffoldC05	B7	BnaC05CRK2	BniB07g030380
scaffoldA01	Chr1	BnaA01CRK2	AT1G49580 (AtCRK8)	scaffoldA05	C8	BnaA05CRK2	XM_013744497.1	scaffoldA09	A09	BnaA09CRK5	Bra036089.1	scaffoldC03	B7	BnaC03CRK8	BniB07g030380
scaffoldA08	Chr1	BnaA08CRK8	AT1G49580 (AtCRK8)	scaffoldC01	C8	BnaC01CRK5	XM_013749840.1	scaffoldC09	A06	BnaC09CRK4	Bra019593.1	scaffoldC01	B8	BnaC01CRK5	BniB08g064430
scaffoldC05	Chr1	BnaC05CRK2	AT1G49580 (AtCRK8)	scaffoldC08	C8	BnaC08CRK5	XM_013749840.1	scaffoldC08	A06	BnaC08CRK6	Bra019593.1	scaffoldC08	B8	BnaC08CRK5	BniB08g064430
scaffoldA05	Chr1	BnaA05CRK2	AT1G49580 (AtCRK8)	scaffoldA01	C8	BnaA01CRK5	XM_013749840.1	scaffoldC03	A06	BnaC03CRK6	Bra019593.1	scaffoldA01	B8	BnaA01CRK5	BniB08g064430
scaffoldC03	Chr1	BnaC03CRK8	AT1G49580 (AtCRK8)	scaffoldA09	C8	BnaA09CRK5	XM_013749840.1	scaffoldC09	A06	BnaC09CRK4	Bra009765.1	scaffoldA09	B8	BnaA09CRK5	BniB08g064430
				scaffoldC09	C7	BnaC09CRK4	XM_013740282.1	scaffoldC07	A06	BnaC07CRK4	Bra009765.1	scaffoldC09	B2	BnaC09CRK4	BniB02g077300
				scaffoldC07	C7	BnaC07CRK4	XM_013740282.1	scaffoldC08	A06	BnaC08CRK6	Bra009765.1	scaffoldC07	B2	BnaC07CRK4	BniB02g077300
				scaffoldC08	C7	BnaC08CRK6	XM_013740282.1	scaffoldA09	A06	BnaA09CRK4	Bra009765.1	scaffoldC08	B2	BnaC08CRK6	BniB02g077300
				scaffoldA09	C7	BnaA09CRK4	XM_013740282.1	scaffoldA06	A06	BnaA06CRK6-1	Bra009765.1	scaffoldA09	B2	BnaA09CRK4	BniB02g077300
				scaffoldA06	C7	BnaA06CRK6-1	XM_013740282.1	scaffoldC09	A09	BnaC09CRK4	Bra036512.1	scaffoldA06	B2	BnaA06CRK6-1	BniB02g077300
				scaffoldC09	C9	BnaC09CRK4	XM_013750549.1	scaffoldC07	A09	BnaC07CRK4	Bra036512.1	scaffoldC09	B7	BnaC09CRK4	BniB07g040180
				scaffoldC07	C9	BnaC07CRK4	XM_013750549.1	scaffoldA09	A09	BnaA09CRK4	Bra036512.1	scaffoldC07	B7	BnaC07CRK4	BniB07g040180
				scaffoldA09	C9	BnaA09CRK4	XM_013750549.1	scaffoldC07	A06	BnaC07CRK4	Bra017989.1	scaffoldA09	B7	BnaA09CRK4	BniB07g040180
				scaffoldC07	C8	BnaC07CRK4	XM_013747238.1	scaffoldC08	A06	BnaC08CRK6	Bra017989.1	scaffoldA06	B7	BnaA06CRK6-2	BniB07g040180
				scaffoldC08	C8	BnaC08CRK6	XM_013747238.1	scaffoldC03	A06	BnaC03CRK6	Bra017989.1	scaffoldC08	B6	BnaC08CRK6	BniB06g010020
				scaffoldC03	C8	BnaC03CRK6	XM_013747238.1	scaffoldA06	A06	BnaA06CRK6-1	Bra017989.1	scaffoldC03	B6	BnaC03CRK6	BniB06g010020
				scaffoldA06	C8	BnaA06CRK6-2	XM_013747238.1	scaffoldA06	A06	BnaA06CRK6-2	Bra017989.1	scaffoldA06	B6	BnaA06CRK6-2	BniB06g010020
				scaffoldA06	C8	BnaA06CRK6-1	XM_013747238.1	scaffoldC04	A03	BnaC04CRK7-1	Bra000215.1	scaffoldA06	B6	BnaA06CRK6-1	BniB06g010020
				scaffoldC08	C3	BnaC08CRK6	XM_013774186.1	scaffoldA03	A03	BnaA03CRK1	Bra000215.1	scaffoldC08	B8	BnaC08CRK6	BniB08g062930
				scaffoldC03	C3	BnaC03CRK6	XM_013774186.1	scaffoldA05	A03	BnaA05CRK7	Bra000215.1	scaffoldC03	B8	BnaC03CRK6	BniB08g062930
				scaffoldA06	C3	BnaA06CRK6-1	XM_013774186.1	scaffoldC04	A04	BnaC04CRK3	Bra039263.1	scaffoldA06	B8	BnaA06CRK6-2	BniB08g062930
				scaffoldA06	C3	BnaA06CRK6-2	XM_013774186.1	scaffoldA04	A04	BnaA04CRK3	Bra039263.1	scaffoldA06	B8	BnaA06CRK6-1	BniB08g062930
				scaffoldC04	C3	BnaC04CRK7-1	XM_013766672.1	scaffoldC04	A04	BnaC04CRK7-2	Bra014673.1	scaffoldC04	B1	BnaC04CRK3	BniB01g000760
				scaffoldC04	C3	BnaC04CRK7-2	XM_013766672.1	scaffoldA04	A04	BnaA04CRK7	Bra014673.1	scaffoldA04	B1	BnaA04CRK3	BniB01g000760
				scaffoldA03	C3	BnaA03CRK1	XM_013766672.1	scaffoldA05	A04	BnaA05CRK7	Bra014673.1	scaffoldC04	B1	BnaC04CRK7-1	BniB01g004300
				scaffoldA05	C3	BnaA05CRK7	XM_013766672.1	scaffoldC04	A04	BnaC04CRK7-1	Bra016950.1	scaffoldA03	B1	BnaA03CRK1	BniB01g004300
				scaffoldC04	C4	BnaC04CRK3	XM_013775666.1	scaffoldA03	A04	BnaA03CRK1	Bra016950.1	scaffoldA05	B1	BnaA05CRK7	BniB01g004300
				scaffoldA04	C4	BnaA04CRK3	XM_013775666.1	scaffoldA05	A04	BnaA05CRK7	Bra016950.1	scaffoldC04	B6	BnaC04CRK7-1	BniB06g000460
				scaffoldC04	C4	BnaC04CRK7-1	XM_013781701.1	scaffoldC04	A05	BnaC04CRK7-1	Bra004600.1	scaffoldA03	B6	BnaA03CRK1	BniB06g000460
				scaffoldA03	C4	BnaA03CRK1	XM_013781701.1	scaffoldC04	A05	BnaC04CRK7-2	Bra004600.1	scaffoldA05	B6	BnaA05CRK7	BniB06g000460
				scaffoldA05	C4	BnaA05CRK7	XM_013781701.1	scaffoldA03	A05	BnaA03CRK1	Bra004600.1	scaffoldC04	B6	BnaC04CRK7-2	BniB06g064200
				scaffoldC04	C4	BnaC04CRK7-2	XM_013776788.1	scaffoldA04	A05	BnaA04CRK7	Bra004600.1	scaffoldA04	B6	BnaA04CRK7	BniB06g064200
				scaffoldA04	C4	BnaA04CRK7	XM_013776788.1	scaffoldA05	A05	BnaA05CRK7	Bra004600.1	scaffoldA05	B6	BnaA05CRK7	BniB06g064200
								scaffoldA06	A06	BnaA06CRK6-1	Bra019593.1	scaffoldC04	B8	BnaC04CRK7-1	BniB08g026760
								scaffoldA06	A06	BnaA06CRK6-2	Bra019593.1	scaffoldA03	B8	BnaA03CRK1	BniB08g026760
												scaffoldA05	B8	BnaA05CRK7	BniB08g026760

## Sheet: Table S4
Table S4. Ka/Ks substitution prediction of BnaCRKs
Gene Seq1	Gene Seq2	Ka	Ks	Ka/Ks	pS	Date (MYA)	Tpm
BnaC03CRK1	BnaA03CRK1	0.00769238	0.111013	0.0692925	0.103188	3.70044e+06	3.70044
BnaA05CRK2	BnaA03CRK1	0.272309	2.19922	0.12382	0.710044	7.33075e+07	73.3075
BnaC05CRK2	BnaA03CRK1	0.268048	2.10537	0.127317	0.704718	7.0179e+07	70.179
BnaC01CRK2	BnaA03CRK1	0.2746	1.77679	0.154549	0.679823	5.92262e+07	59.2262
BnaA01CRK2	BnaA03CRK1	0.270517	1.89135	0.143028	0.689764	6.30451e+07	63.0451
BnaC09CRK4	BnaA03CRK1	0.330911	3.71093	0.0891718	0.744676	1.23698e+08	123.698
BnaC08CRK5	BnaA03CRK1	0.200512	2.76298	0.072571	0.731158	9.20995e+07	92.0995
BnaA09CRK5	BnaA03CRK1	0.199062	2.5958	0.0766864	0.726453	8.65265e+07	86.5265
BnaA01CRK5	BnaA03CRK1	0.205734	2.17016	0.0948015	0.708465	7.23386e+07	72.3386
BnaC01CRK5	BnaA03CRK1	0.200876	2.13171	0.0942322	0.70628	7.10569e+07	71.0569
BnaC03CRK6	BnaA03CRK1	0.343593	3.87009	0.0887816	0.745694	1.29003e+08	129.003
BnaA05CRK7	BnaA03CRK1	0.0269052	0.342132	0.07864	0.274723	1.14044e+07	11.4044
BnaC04CRK7-1	BnaA03CRK1	0.0241752	0.360937	0.0669789	0.286492	1.20312e+07	12.0312
BnaC04CRK7-2	BnaA03CRK1	0.0698319	0.777663	0.0897971	0.484082	2.59221e+07	25.9221
BnaA04CRK7	BnaA03CRK1	0.0833244	0.792998	0.105075	0.489464	2.64333e+07	26.4333
BnaA08CRK8	BnaA03CRK1	0.283802	2.11468	0.134206	0.705276	7.04893e+07	70.4893
BnaC03CRK8	BnaA03CRK1	0.273648	1.6562	0.165227	0.667581	5.52065e+07	55.2065
BnaA03CRK8	BnaA03CRK1	0.278473	1.71832	0.162061	0.674134	5.72775e+07	57.2775
BnaA05CRK2	BnaC03CRK1	0.270395	1.87176	0.14446	0.68817	6.2392e+07	62.392
BnaC05CRK2	BnaC03CRK1	0.269378	1.82043	0.147975	0.683789	6.06808e+07	60.6808
BnaC01CRK2	BnaC03CRK1	0.282924	1.68601	0.167807	0.670793	5.62003e+07	56.2003
BnaA01CRK2	BnaC03CRK1	0.272586	1.80392	0.151108	0.682316	6.01305e+07	60.1305
BnaC09CRK4	BnaC03CRK1	0.335036	4.72156	0.0709587	0.748616	1.57385e+08	157.385
BnaC08CRK5	BnaC03CRK1	0.202556	2.75083	0.0736345	0.73085	9.16945e+07	91.6945
BnaA09CRK5	BnaC03CRK1	0.204122	2.51094	0.081293	0.723632	8.36979e+07	83.6979
BnaA01CRK5	BnaC03CRK1	0.20743	2.43435	0.0852094	0.720797	8.11451e+07	81.1451
BnaC01CRK5	BnaC03CRK1	0.199667	2.54411	0.078482	0.724773	8.48035e+07	84.8035
BnaC03CRK6	BnaC03CRK1	0.343049	4.74601	0.0722817	0.748661	1.582e+08	158.2
BnaA05CRK7	BnaC03CRK1	0.0249649	0.345029	0.072356	0.276556	1.1501e+07	11.501
BnaC04CRK7-1	BnaC03CRK1	0.0249714	0.356691	0.0700086	0.28386	1.18897e+07	11.8897
BnaC04CRK7-2	BnaC03CRK1	0.0694882	0.764574	0.0908849	0.4794	2.54858e+07	25.4858
BnaA04CRK7	BnaC03CRK1	0.084321	0.759988	0.11095	0.477741	2.53329e+07	25.3329
BnaA08CRK8	BnaC03CRK1	0.293037	2.25128	0.130164	0.712723	7.50427e+07	75.0427
BnaC03CRK8	BnaC03CRK1	0.278139	1.56423	0.177812	0.65683	5.21411e+07	52.1411
BnaA03CRK8	BnaC03CRK1	0.280473	1.71823	0.163234	0.674124	5.72744e+07	57.2744
BnaC05CRK2	BnaA05CRK2	0.00513858	0.134933	0.0380826	0.123491	4.49775e+06	4.49775
BnaC01CRK2	BnaA05CRK2	0.031029	0.318313	0.0974795	0.259387	1.06104e+07	10.6104
BnaA01CRK2	BnaA05CRK2	0.0283713	0.30041	0.0944419	0.247535	1.00137e+07	10.0137
BnaA04CRK3	BnaA05CRK2	0.307397	2.09974	0.146398	0.704377	6.99913e+07	69.9913
BnaC04CRK3	BnaA05CRK2	0.308903	2.02547	0.152509	0.699628	6.75158e+07	67.5158
BnaC09CRK4	BnaA05CRK2	0.356029	2.10376	0.169234	0.70462	7.01253e+07	70.1253
BnaA09CRK4	BnaA05CRK2	0.367784	1.96109	0.18754	0.695113	6.53698e+07	65.3698
BnaC08CRK5	BnaA05CRK2	0.219078	2.7735	0.0789898	0.73142	9.24501e+07	92.4501
BnaA09CRK5	BnaA05CRK2	0.216664	3.23688	0.066936	0.739983	1.07896e+08	107.896
BnaC01CRK5	BnaA05CRK2	0.231861	3.60424	0.06433	0.743863	1.20141e+08	120.141
BnaA06CRK6-1	BnaA05CRK2	0.349225	2.84882	0.122586	0.733195	9.49606e+07	94.9606
BnaC03CRK6	BnaA05CRK2	0.357805	4.04429	0.0884717	0.746587	1.3481e+08	134.81
BnaC08CRK6	BnaA05CRK2	0.35793	3.82581	0.0935566	0.745432	1.27527e+08	127.527
BnaA05CRK7	BnaA05CRK2	0.275356	1.85783	0.148214	0.68701	6.19276e+07	61.9276
BnaC04CRK7-1	BnaA05CRK2	0.279525	2.0182	0.138502	0.699137	6.72734e+07	67.2734
BnaC04CRK7-2	BnaA05CRK2	0.283028	1.76557	0.160304	0.678765	5.88523e+07	58.8523
BnaA04CRK7	BnaA05CRK2	0.32077	2.00475	0.160005	0.698216	6.6825e+07	66.825
BnaA08CRK8	BnaA05CRK2	0.104757	0.769994	0.13605	0.481348	2.56665e+07	25.6665
BnaC03CRK8	BnaA05CRK2	0.0424789	0.338445	0.125512	0.272381	1.12815e+07	11.2815
BnaA03CRK8	BnaA05CRK2	0.0511803	0.360703	0.14189	0.286347	1.20234e+07	12.0234
BnaC08CRK8	BnaA05CRK2	0.166852	0.689025	0.242157	0.450722	2.29675e+07	22.9675
BnaC01CRK2	BnaC05CRK2	0.0310072	0.304404	0.101862	0.250203	1.01468e+07	10.1468
BnaA01CRK2	BnaC05CRK2	0.0283516	0.304856	0.0930002	0.250504	1.01619e+07	10.1619
BnaA04CRK3	BnaC05CRK2	0.311028	2.36517	0.131503	0.717975	7.88389e+07	78.8389
BnaC04CRK3	BnaC05CRK2	0.312527	2.37086	0.13182	0.718217	7.90288e+07	79.0288
BnaC09CRK4	BnaC05CRK2	0.356794	2.09137	0.170603	0.703864	6.97122e+07	69.7122
BnaA09CRK4	BnaC05CRK2	0.351082	1.86908	0.187836	0.687949	6.23028e+07	62.3028
BnaC08CRK5	BnaC05CRK2	0.221441	3.1907	0.069402	0.739347	1.06357e+08	106.357
BnaA09CRK5	BnaC05CRK2	0.213182	3.16875	0.0672763	0.739031	1.05625e+08	105.625
BnaA01CRK5	BnaC05CRK2	0.226731	5.06672	0.0447491	0.749127	1.68891e+08	168.891
BnaC01CRK5	BnaC05CRK2	0.229757	3.10459	0.0740055	0.738051	1.03486e+08	103.486
BnaA06CRK6-1	BnaC05CRK2	0.351841	3.58227	0.0982171	0.74368	1.19409e+08	119.409
BnaA05CRK7	BnaC05CRK2	0.277276	1.71328	0.16184	0.673621	5.71092e+07	57.1092
BnaC04CRK7-1	BnaC05CRK2	0.280529	1.75746	0.159622	0.677991	5.85819e+07	58.5819
BnaC04CRK7-2	BnaC05CRK2	0.287228	1.96363	0.146274	0.695298	6.54542e+07	65.4542
BnaA04CRK7	BnaC05CRK2	0.325903	2.27278	0.143394	0.713777	7.57593e+07	75.7593
BnaA08CRK8	BnaC05CRK2	0.10724	0.753049	0.142408	0.47521	2.51016e+07	25.1016
BnaC03CRK8	BnaC05CRK2	0.0440199	0.30969	0.142142	0.253713	1.0323e+07	10.323
BnaA03CRK8	BnaC05CRK2	0.0519405	0.334763	0.155156	0.27003	1.11588e+07	11.1588
BnaC08CRK8	BnaC05CRK2	0.182417	0.68378	0.266777	0.448622	2.27927e+07	22.7927
BnaA01CRK2	BnaC01CRK2	0.00895143	0.0732751	0.122162	0.0698094	2.4425e+06	2.4425
BnaA04CRK3	BnaC01CRK2	0.349525	2.06078	0.169608	0.701944	6.86928e+07	68.6928
BnaC04CRK3	BnaC01CRK2	0.348105	2.06412	0.168646	0.702158	6.88041e+07	68.8041
BnaC09CRK4	BnaC01CRK2	0.342223	2.15242	0.158994	0.707472	7.17475e+07	71.7475
BnaA09CRK4	BnaC01CRK2	0.325367	2.17884	0.14933	0.708944	7.26281e+07	72.6281
BnaC08CRK5	BnaC01CRK2	0.227156	3.40191	0.066773	0.741962	1.13397e+08	113.397
BnaA09CRK5	BnaC01CRK2	0.217792	3.66674	0.0593966	0.744353	1.22225e+08	122.225
BnaA06CRK6-1	BnaC01CRK2	0.357249	3.44634	0.10366	0.742424	1.14878e+08	114.878
BnaC08CRK6	BnaC01CRK2	0.355949	2.62115	0.135799	0.727235	8.73716e+07	87.3716
BnaA05CRK7	BnaC01CRK2	0.281267	1.60297	0.175466	0.661519	5.34323e+07	53.4323
BnaC04CRK7-1	BnaC01CRK2	0.290104	1.71356	0.169299	0.67365	5.71185e+07	57.1185
BnaC04CRK7-2	BnaC01CRK2	0.27773	1.71056	0.162362	0.673345	5.70188e+07	57.0188
BnaA04CRK7	BnaC01CRK2	0.31551	1.82091	0.173271	0.683832	6.0697e+07	60.697
BnaA08CRK8	BnaC01CRK2	0.11537	0.710547	0.162368	0.459188	2.36849e+07	23.6849
BnaC03CRK8	BnaC01CRK2	0.0453897	0.292893	0.15497	0.242473	9.76309e+06	9.76309
BnaA03CRK8	BnaC01CRK2	0.0551783	0.318451	0.173271	0.259477	1.0615e+07	10.615
BnaC08CRK8	BnaC01CRK2	0.18082	0.668869	0.270337	0.44257	2.22956e+07	22.2956
BnaA04CRK3	BnaA01CRK2	0.337785	2.02002	0.167219	0.69926	6.7334e+07	67.334
BnaC04CRK3	BnaA01CRK2	0.336583	1.94908	0.172688	0.694227	6.49694e+07	64.9694
BnaC09CRK4	BnaA01CRK2	0.352961	2.193	0.160949	0.709711	7.31e+07	73.1
BnaA09CRK4	BnaA01CRK2	0.336518	2.14672	0.156759	0.707147	7.15572e+07	71.5572
BnaC08CRK5	BnaA01CRK2	0.220193	3.82577	0.0575552	0.745432	1.27526e+08	127.526
BnaA09CRK5	BnaA01CRK2	0.214403	3.18987	0.0672137	0.739336	1.06329e+08	106.329
BnaA06CRK6-1	BnaA01CRK2	0.352357	3.08688	0.114147	0.737766	1.02896e+08	102.896
BnaC08CRK6	BnaA01CRK2	0.34943	4.15996	0.0839984	0.747075	1.38665e+08	138.665
BnaA05CRK7	BnaA01CRK2	0.28087	1.62975	0.17234	0.664623	5.43249e+07	54.3249
BnaC04CRK7-1	BnaA01CRK2	0.289643	1.64976	0.175567	0.666871	5.49919e+07	54.9919
BnaC04CRK7-2	BnaA01CRK2	0.284269	1.93126	0.147194	0.692885	6.43754e+07	64.3754
BnaA04CRK7	BnaA01CRK2	0.314105	2.07671	0.151251	0.702954	6.92236e+07	69.2236
BnaA08CRK8	BnaA01CRK2	0.118516	0.687665	0.172345	0.450179	2.29222e+07	22.9222
BnaC03CRK8	BnaA01CRK2	0.0404988	0.324623	0.124756	0.263497	1.08208e+07	10.8208
BnaA03CRK8	BnaA01CRK2	0.0437688	0.315736	0.138625	0.257699	1.05245e+07	10.5245
BnaC08CRK8	BnaA01CRK2	0.188697	0.648807	0.290837	0.434235	2.16269e+07	21.6269
BnaC04CRK3	BnaA04CRK3	0.00441557	0.0663552	0.0665444	0.0635045	2.21184e+06	2.21184
BnaC09CRK4	BnaA04CRK3	0.241883	1.92601	0.125588	0.692484	6.42002e+07	64.2002
BnaA09CRK4	BnaA04CRK3	0.240651	2.55737	0.0941011	0.725215	8.52455e+07	85.2455
BnaC07CRK4	BnaA04CRK3	0.253756	2.17996	0.116404	0.709005	7.26653e+07	72.6653
BnaA06CRK6-1	BnaA04CRK3	0.266911	3.64304	0.073266	0.744172	1.21435e+08	121.435
BnaA06CRK6-2	BnaA04CRK3	0.268011	2.89457	0.0925909	0.73419	9.64856e+07	96.4856
BnaC03CRK6	BnaA04CRK3	0.261197	2.79399	0.0934853	0.731921	9.3133e+07	93.133
BnaC04CRK7-2	BnaA04CRK3	0.300377	3.08043	0.0975114	0.73766	1.02681e+08	102.681
BnaA08CRK8	BnaA04CRK3	0.315382	2.25001	0.140169	0.71266	7.50004e+07	75.0004
BnaC03CRK8	BnaA04CRK3	0.321123	1.92965	0.166416	0.692762	6.43216e+07	64.3216
BnaA03CRK8	BnaA04CRK3	0.311471	2.34074	0.133065	0.716915	7.80247e+07	78.0247
BnaC08CRK8	BnaA04CRK3	0.427391	1.39064	0.307334	0.632565	4.63547e+07	46.3547
BnaC09CRK4	BnaC04CRK3	0.244249	1.94509	0.125573	0.693929	6.48362e+07	64.8362
BnaA09CRK4	BnaC04CRK3	0.237042	2.2466	0.105511	0.71249	7.48868e+07	74.8868
BnaC07CRK4	BnaC04CRK3	0.249975	2.21443	0.112885	0.710846	7.38142e+07	73.8142
BnaA06CRK6-1	BnaC04CRK3	0.266708	2.9822	0.0894331	0.735933	9.94067e+07	99.4067
BnaA06CRK6-2	BnaC04CRK3	0.267809	2.58185	0.103727	0.726011	8.60618e+07	86.0618
BnaC03CRK6	BnaC04CRK3	0.276414	2.79963	0.0987321	0.732056	9.33211e+07	93.3211
BnaC04CRK7-2	BnaC04CRK3	0.303017	2.56059	0.118339	0.725321	8.5353e+07	85.353
BnaA04CRK7	BnaC04CRK3	0.322461	3.90031	0.0826757	0.745864	1.3001e+08	130.01
BnaA08CRK8	BnaC04CRK3	0.315326	2.05057	0.153775	0.701285	6.83523e+07	68.3523
BnaC03CRK8	BnaC04CRK3	0.322813	2.02951	0.15906	0.699898	6.76502e+07	67.6502
BnaA03CRK8	BnaC04CRK3	0.326244	2.5922	0.125856	0.72634	8.64067e+07	86.4067
BnaC08CRK8	BnaC04CRK3	0.43167	1.53153	0.281855	0.652677	5.1051e+07	51.051
BnaA09CRK4	BnaC09CRK4	0.0255029	0.110209	0.231406	0.102494	3.67362e+06	3.67362
BnaC07CRK4	BnaC09CRK4	0.0516872	0.395623	0.130648	0.30744	1.31874e+07	13.1874
BnaC08CRK5	BnaC09CRK4	0.335808	1.77155	0.189556	0.679331	5.90517e+07	59.0517
BnaA09CRK5	BnaC09CRK4	0.335762	1.74496	0.192419	0.67678	5.81652e+07	58.1652
BnaA01CRK5	BnaC09CRK4	0.338812	2.58607	0.131014	0.726145	8.62024e+07	86.2024
BnaC01CRK5	BnaC09CRK4	0.342832	2.40381	0.14262	0.719583	8.01271e+07	80.1271
BnaA06CRK6-1	BnaC09CRK4	0.0838583	0.717359	0.116899	0.461817	2.3912e+07	23.912
BnaA06CRK6-2	BnaC09CRK4	0.077631	0.751117	0.103354	0.474501	2.50372e+07	25.0372
BnaC03CRK6	BnaC09CRK4	0.0817414	0.69755	0.117184	0.454104	2.32517e+07	23.2517
BnaC08CRK6	BnaC09CRK4	0.0826028	0.74571	0.110771	0.472508	2.4857e+07	24.857
BnaA05CRK7	BnaC09CRK4	0.349402	2.93114	0.119203	0.734942	9.77046e+07	97.7046
BnaC04CRK7-1	BnaC09CRK4	0.362373	2.7904	0.129864	0.731834	9.30134e+07	93.0134
BnaC04CRK7-2	BnaC09CRK4	0.351668	5.96457	0.0589595	0.749736	1.98819e+08	198.819
BnaA08CRK8	BnaC09CRK4	0.342691	1.61507	0.212184	0.662935	5.38355e+07	53.8355
BnaC03CRK8	BnaC09CRK4	0.345545	2.36151	0.146323	0.717819	7.87171e+07	78.7171
BnaA03CRK8	BnaC09CRK4	0.358018	2.21837	0.161388	0.711051	7.39456e+07	73.9456
BnaC08CRK8	BnaC09CRK4	0.460939	1.32137	0.348835	0.621201	4.40456e+07	44.0456
BnaC07CRK4	BnaA09CRK4	0.0725454	0.456627	0.158872	0.342012	1.52209e+07	15.2209
BnaC08CRK5	BnaA09CRK4	0.319034	1.97064	0.161894	0.695807	6.5688e+07	65.688
BnaA09CRK5	BnaA09CRK4	0.328203	2.07661	0.158047	0.702948	6.92204e+07	69.2204
BnaA01CRK5	BnaA09CRK4	0.330856	2.84574	0.116263	0.733126	9.48582e+07	94.8582
BnaC01CRK5	BnaA09CRK4	0.323368	3.1818	0.10163	0.73922	1.0606e+08	106.06
BnaA06CRK6-1	BnaA09CRK4	0.0970224	0.845864	0.114702	0.507196	2.81955e+07	28.1955
BnaA06CRK6-2	BnaA09CRK4	0.0931137	0.830309	0.112143	0.502108	2.7677e+07	27.677
BnaC03CRK6	BnaA09CRK4	0.0967874	0.751563	0.128782	0.474665	2.50521e+07	25.0521
BnaC08CRK6	BnaA09CRK4	0.096024	0.851572	0.112761	0.509037	2.83857e+07	28.3857
BnaA05CRK7	BnaA09CRK4	0.326378	2.8472	0.114631	0.733159	9.49068e+07	94.9068
BnaC04CRK7-1	BnaA09CRK4	0.337368	2.52625	0.133545	0.724165	8.42083e+07	84.2083
BnaC04CRK7-2	BnaA09CRK4	0.350309	3.27422	0.10699	0.74047	1.09141e+08	109.141
BnaA08CRK8	BnaA09CRK4	0.344177	1.6146	0.213166	0.662881	5.38199e+07	53.8199
BnaC03CRK8	BnaA09CRK4	0.347136	2.52445	0.13751	0.724103	8.41482e+07	84.1482
BnaA03CRK8	BnaA09CRK4	0.3436	2.14258	0.160367	0.70691	7.14195e+07	71.4195
BnaC08CRK8	BnaA09CRK4	0.453442	1.16583	0.388944	0.591519	3.8861e+07	38.861
BnaC08CRK5	BnaC07CRK4	0.355307	2.45618	0.144659	0.721635	8.18725e+07	81.8725
BnaA09CRK5	BnaC07CRK4	0.3594	2.35497	0.152613	0.717537	7.84989e+07	78.4989
BnaC01CRK5	BnaC07CRK4	0.331591	4.00953	0.0827006	0.746425	1.33651e+08	133.651
BnaA06CRK6-1	BnaC07CRK4	0.092825	0.813726	0.114074	0.496566	2.71242e+07	27.1242
BnaA06CRK6-2	BnaC07CRK4	0.083456	0.805987	0.103545	0.493937	2.68662e+07	26.8662
BnaC03CRK6	BnaC07CRK4	0.0896945	0.815519	0.109985	0.497171	2.7184e+07	27.184
BnaC08CRK6	BnaC07CRK4	0.0945504	0.85133	0.111062	0.508959	2.83777e+07	28.3777
BnaA08CRK8	BnaC07CRK4	0.365953	3.19577	0.114512	0.739419	1.06526e+08	106.526
BnaC08CRK8	BnaC07CRK4	0.449764	1.83107	0.245629	0.684722	6.10355e+07	61.0355
BnaA09CRK5	BnaC08CRK5	0.00589756	0.0856275	0.0688746	0.0809203	2.85425e+06	2.85425
BnaA01CRK5	BnaC08CRK5	0.0300773	0.410132	0.0733356	0.315919	1.36711e+07	13.6711
BnaC01CRK5	BnaC08CRK5	0.0380288	0.396024	0.0960264	0.307677	1.32008e+07	13.2008
BnaA06CRK6-1	BnaC08CRK5	0.319677	2.24465	0.142418	0.712392	7.48215e+07	74.8215
BnaA06CRK6-2	BnaC08CRK5	0.327973	2.59577	0.126349	0.726452	8.65257e+07	86.5257
BnaC03CRK6	BnaC08CRK5	0.325994	2.34314	0.139127	0.71702	7.81046e+07	78.1046
BnaC08CRK6	BnaC08CRK5	0.319864	2.16967	0.147425	0.708438	7.23223e+07	72.3223
BnaA05CRK7	BnaC08CRK5	0.213404	2.64179	0.08078	0.727853	8.80596e+07	88.0596
BnaC04CRK7-1	BnaC08CRK5	0.215497	2.94887	0.073078	0.735294	9.82956e+07	98.2956
BnaC04CRK7-2	BnaC08CRK5	0.22716	2.1473	0.105788	0.70718	7.15767e+07	71.5767
BnaA04CRK7	BnaC08CRK5	0.245739	2.97677	0.0825522	0.735831	9.92257e+07	99.2257
BnaA08CRK8	BnaC08CRK5	0.227715	1.81485	0.125473	0.683296	6.04952e+07	60.4952
BnaC03CRK8	BnaC08CRK5	0.22721	1.91567	0.118606	0.691686	6.38556e+07	63.8556
BnaA03CRK8	BnaC08CRK5	0.242385	3.00296	0.0807154	0.736317	1.00099e+08	100.099
BnaC08CRK8	BnaC08CRK5	0.396242	1.76402	0.224624	0.678618	5.88007e+07	58.8007
BnaA01CRK5	BnaA09CRK5	0.0269329	0.410357	0.0656328	0.316049	1.36786e+07	13.6786
BnaC01CRK5	BnaA09CRK5	0.0372498	0.399953	0.0931355	0.309988	1.33318e+07	13.3318
BnaA06CRK6-1	BnaA09CRK5	0.345189	2.4052	0.143518	0.71964	8.01733e+07	80.1733
BnaA06CRK6-2	BnaA09CRK5	0.334466	1.86383	0.17945	0.687513	6.21278e+07	62.1278
BnaC03CRK6	BnaA09CRK5	0.335793	1.91835	0.175042	0.691894	6.39452e+07	63.9452
BnaC08CRK6	BnaA09CRK5	0.345239	2.38293	0.14488	0.718724	7.94309e+07	79.4309
BnaA05CRK7	BnaA09CRK5	0.204954	2.37615	0.0862545	0.718441	7.9205e+07	79.205
BnaC04CRK7-1	BnaA09CRK5	0.207043	2.43865	0.0849007	0.720964	8.12882e+07	81.2882
BnaC04CRK7-2	BnaA09CRK5	0.224249	2.24083	0.100074	0.7122	7.46942e+07	74.6942
BnaA04CRK7	BnaA09CRK5	0.236874	2.64775	0.0894625	0.728029	8.82582e+07	88.2582
BnaA08CRK8	BnaA09CRK5	0.234766	1.92089	0.122218	0.69209	6.40295e+07	64.0295
BnaC03CRK8	BnaA09CRK5	0.218478	1.89959	0.115013	0.690422	6.33196e+07	63.3196
BnaA03CRK8	BnaA09CRK5	0.215501	2.13099	0.101128	0.706238	7.10328e+07	71.0328
BnaC08CRK8	BnaA09CRK5	0.388667	1.7414	0.223192	0.676432	5.80467e+07	58.0467
BnaC01CRK5	BnaA01CRK5	0.00685197	0.0757494	0.0904558	0.0720497	2.52498e+06	2.52498
BnaA05CRK7	BnaA01CRK5	0.206535	2.2753	0.090773	0.713898	7.58432e+07	75.8432
BnaC04CRK7-1	BnaA01CRK5	0.205723	2.20356	0.0933593	0.710275	7.3452e+07	73.452
BnaC04CRK7-2	BnaA01CRK5	0.226304	1.88765	0.119886	0.689466	6.29217e+07	62.9217
BnaA04CRK7	BnaA01CRK5	0.233424	2.1407	0.109041	0.706801	7.13565e+07	71.3565
BnaA08CRK8	BnaA01CRK5	0.216158	2.1512	0.100483	0.707402	7.17067e+07	71.7067
BnaC03CRK8	BnaA01CRK5	0.208478	2.65111	0.0786379	0.728127	8.83705e+07	88.3705
BnaA03CRK8	BnaA01CRK5	0.212984	4.96868	0.0428654	0.749005	1.65623e+08	165.623
BnaC08CRK8	BnaA01CRK5	0.368531	1.45369	0.253514	0.642034	4.84564e+07	48.4564
BnaA05CRK7	BnaC01CRK5	0.207137	2.23064	0.09286	0.711683	7.43548e+07	74.3548
BnaC04CRK7-1	BnaC01CRK5	0.196708	2.05542	0.0957023	0.701599	6.8514e+07	68.514
BnaC04CRK7-2	BnaC01CRK5	0.223873	1.77068	0.126433	0.679249	5.90228e+07	59.0228
BnaA04CRK7	BnaC01CRK5	0.236226	1.90597	0.12394	0.690927	6.35324e+07	63.5324
BnaA08CRK8	BnaC01CRK5	0.223352	2.3779	0.0939283	0.718514	7.92632e+07	79.2632
BnaC03CRK8	BnaC01CRK5	0.225385	2.39358	0.0941624	0.719165	7.9786e+07	79.786
BnaA03CRK8	BnaC01CRK5	0.219381	2.86058	0.0766911	0.733457	9.53528e+07	95.3528
BnaC08CRK8	BnaC01CRK5	0.353683	1.59702	0.221465	0.660815	5.32339e+07	53.2339
BnaA06CRK6-2	BnaA06CRK6-1	0.0315916	0.291438	0.108399	0.241488	9.7146e+06	9.7146
BnaC03CRK6	BnaA06CRK6-1	0.034674	0.284981	0.121671	0.237091	9.49937e+06	9.49937
BnaC08CRK6	BnaA06CRK6-1	0.00970465	0.0741802	0.130825	0.0706298	2.47267e+06	2.47267
BnaC04CRK7-2	BnaA06CRK6-1	0.341445	3.31	0.103156	0.740914	1.10333e+08	110.333
BnaA04CRK7	BnaA06CRK6-1	0.386775	3.26628	0.118415	0.740369	1.08876e+08	108.876
BnaC08CRK8	BnaA06CRK6-1	0.454438	2.93302	0.154939	0.73498	9.77672e+07	97.7672
BnaC03CRK6	BnaA06CRK6-2	0.00441692	0.0535616	0.0824643	0.0516938	1.78539e+06	1.78539
BnaC08CRK6	BnaA06CRK6-2	0.0338731	0.307786	0.110054	0.252452	1.02595e+07	10.2595
BnaC08CRK6	BnaC03CRK6	0.0369603	0.29422	0.125621	0.243371	9.80734e+06	9.80734
BnaC04CRK7-2	BnaC03CRK6	0.343648	3.14787	0.109168	0.738721	1.04929e+08	104.929
BnaA08CRK8	BnaC03CRK6	0.335466	3.38046	0.0992368	0.741729	1.12682e+08	112.682
BnaC08CRK8	BnaC03CRK6	0.44347	3.49454	0.126904	0.742896	1.16485e+08	116.485
BnaC04CRK7-2	BnaC08CRK6	0.345841	5.14219	0.0672557	0.74921	1.71406e+08	171.406
BnaA04CRK7	BnaC08CRK6	0.401262	4.21778	0.0951358	0.747292	1.40593e+08	140.593
BnaA08CRK8	BnaC08CRK6	0.354811	3.50088	0.101349	0.742956	1.16696e+08	116.696
BnaC08CRK8	BnaC08CRK6	0.464171	2.45492	0.189078	0.721587	8.18307e+07	81.8307
BnaC04CRK7-1	BnaA05CRK7	0.00379076	0.107702	0.0351967	0.100326	3.59007e+06	3.59007
BnaC04CRK7-2	BnaA05CRK7	0.070546	0.91136	0.0774074	0.5275	3.03787e+07	30.3787
BnaA04CRK7	BnaA05CRK7	0.0754601	0.925403	0.0815429	0.531628	3.08468e+07	30.8468
BnaA08CRK8	BnaA05CRK7	0.271869	1.97225	0.137847	0.695923	6.57418e+07	65.7418
BnaC03CRK8	BnaA05CRK7	0.272652	1.95835	0.139225	0.694912	6.52784e+07	65.2784
BnaA03CRK8	BnaA05CRK7	0.27825	2.09659	0.132715	0.704185	6.98864e+07	69.8864
BnaC08CRK8	BnaA05CRK7	0.395669	2.36582	0.167244	0.718003	7.88606e+07	78.8606
BnaC04CRK7-2	BnaC04CRK7-1	0.0725196	0.933402	0.0776938	0.533944	3.11134e+07	31.1134
BnaA04CRK7	BnaC04CRK7-1	0.0769137	0.910899	0.0844372	0.527363	3.03633e+07	30.3633
BnaA08CRK8	BnaC04CRK7-1	0.275329	2.10066	0.131068	0.704432	7.00219e+07	70.0219
BnaC03CRK8	BnaC04CRK7-1	0.276709	1.89977	0.145653	0.690437	6.33258e+07	63.3258
BnaA03CRK8	BnaC04CRK7-1	0.286376	2.04764	0.139856	0.701095	6.82547e+07	68.2547
BnaC08CRK8	BnaC04CRK7-1	0.432624	2.48836	0.173859	0.722826	8.29454e+07	82.9454
BnaA04CRK7	BnaC04CRK7-2	0.0176492	0.12603	0.140039	0.11601	4.20102e+06	4.20102
BnaA08CRK8	BnaC04CRK7-2	0.304291	1.59342	0.190968	0.660385	5.31138e+07	53.1138
BnaC03CRK8	BnaC04CRK7-2	0.292909	1.68986	0.173334	0.671198	5.63285e+07	56.3285
BnaA03CRK8	BnaC04CRK7-2	0.279322	1.84595	0.151316	0.686005	6.15316e+07	61.5316
BnaC08CRK8	BnaC04CRK7-2	0.460646	1.63464	0.281802	0.665179	5.44881e+07	54.4881
BnaA08CRK8	BnaA04CRK7	0.331454	1.76469	0.187826	0.678682	5.88229e+07	58.8229
BnaC03CRK8	BnaA04CRK7	0.313989	1.83355	0.171246	0.684938	6.11183e+07	61.1183
BnaA03CRK8	BnaA04CRK7	0.333182	2.07968	0.160208	0.70314	6.93226e+07	69.3226
BnaC03CRK8	BnaA08CRK8	0.112234	0.770178	0.145725	0.481415	2.56726e+07	25.6726
BnaA03CRK8	BnaA08CRK8	0.119982	0.756072	0.158691	0.476315	2.52024e+07	25.2024
BnaC08CRK8	BnaA08CRK8	0.00953908	0.0773882	0.123263	0.0735294	2.57961e+06	2.57961
BnaA03CRK8	BnaC03CRK8	0.0212674	0.120779	0.176086	0.111555	4.02596e+06	4.02596
BnaC08CRK8	BnaC03CRK8	0.175471	0.829811	0.211459	0.501943	2.76604e+07	27.6604
BnaC08CRK8	BnaA03CRK8	0.17915	0.888725	0.201581	0.520683	2.96242e+07	29.6242

## Sheet: Table S5
Table S5. Positive selection site prediction of BnaCRKs using different models
Model	Np	Estimation of parameters	InL	Model comparison	2∆InL	Positive selected sites
M0 (one-ratio)	53	ɯ = 0.15217	-18424.9	M0 vs M3	-415.088	None
M3 (discrete)	57	p=0.34660, 0.47381, 0.17959 ɯ=0.01083, 0.15938, 0.55951	-18009.8			None
M1 (neutral)	54	p = 0.82375, 0.17625 ɯ=0.10866, 1.00000	-18180.3	M1 vs M2	0	None
M2 (selection)	56	p: 0.82375 0.13767 0.03858 w: 0.10866 1.00000 1.00000	-18180.3			26V
M7 (beta)	54	p =0.52370 q =2.31977	-18011.2	M7 vs M8	-3.85374	None
M8 (beta&ɯ)	56	p 0.97808, 0.57745, 2.92104 (p1 =0.02192) ɯ =1.25580	-18007.3			24S, 26V, 28S, 50T

## Sheet: Table S6
Table S6. BnaCRKs targeting proteins interaction
Gene Symbol	Protein Name	Arabidopsis orthologs	Interacting Targets	Betweenness Centrality	Closeness Centrality	Degree	coexpression	experimentally_determined_interaction
BnaCRK1	BnaA03CRK1, BnaC03CRK1	AT2G41140 (AtCRK1)	HSF1	0	0.45	3	0	0.604
			PP7				0	0.091
			AT2G20050 (PP2C)				0.198	0.055
BnaCRK2	BnaA05CRK2, BnaC05CRK2, BnaC01CRK2, BnaA01CRK2	AT3G19100 (AtCRK2)	No Interaction	Na
BnaCRK3	BnaA04CRK3, BnaC04CRK3	AT2G46700 (AtCRK3)	AT2G20050 (PP2C)	0	0.45	2	0.198	0.055
			GLN1-1				0	0.501
BnaCRK4	BnaC09CRK4, BnaA09CRK4, BnaC07CRK4	AT5G24430 (AtCRK4)	AT2G20050 (PP2C)	0.195397	0.514286	3	0.198	0.055
			AT2G45300 (EPSP)				0	0
			CP5				0	0
BnaCRK5	BnaC08CRK5, BnaA09CRK5, BnaA01CRK5, BnaC01CRK5	AT3G50530 (AtCRK5)	ARCK1	0.00608466	0.461538	6	0	0.042
			AT2G20050 (PP2C)				0.198	0.055
			CRK36				0	0.042
			CRK13				0	0.042
			CRK19,				0	0.042
			CRK20				0	0.042
BnaCRK6	BnaA06CRK6-1, BnaA06CRK6-2, BnaC03CRK6, BnaC08CRK6	AT3G49370 (AtCRK6)	AT2G20050 (PP2C)	0	0.433735	1	0.198	0.055
BnaCRK7	BnaA05CRK7, BnaC04CRK7-1, BnaC04CRK7-2, BnaA04CRK7	AT3G56760 (AtCRK7)	AT2G20050 (PP2C)	0	0.433735	1	0.198	0.055

## Sheet: Table S7
Table S7.1 Transcriptomic expression profile of the BnaCRKs in multiple tissues
Gene Symbol	root	bud_2mm	bud_4mm	filament	petal	pollen	sepal	cotyledon	vegetative_rosette	leaf_1	seed_64DAF	silique_6DAF	silique_60DAF	lower_stem_peel	middle_stem_peel	upper_stem_peel
BnaA03CRK1	1.87617	2.72683	2.39039	3.081	3.6173	0.773152	3.70984	1.69955	2.19503	0.200379	0.66175	3.30947	1.51652	2.21475	2.26514	1.89142
BnaC03CRK1	1.19975	2.80488	1.38571	1.59168	2.54942	-1.5951	2.58352	1.25882	1.50284	0.782409	1.27917	3.0365	0.370722	2.97251	2.32567	2.3749
BnaA05CRK2	2.58976	2.84519	2.43989	-0.182786	-1.77596	-2.71786	-0.189351	3.40449	3.02077	2.16092	-0.965784	3.05901	2.28155	2.17409	2.07895	2.15381
BnaC05CRK2	2.45654	2.60786	2.29807	-0.883635	-1.02034	-1.43831	-0.957356	3.45075	2.73617	1.88088	-2.25154	2.92353	1.46467	1.96938	2.06592	2.04928
BnaC01CRK2	3.06867	3.59956	3.30787	0.437228	-0.258425	0.0342157	-0.378944	3.0063	2.59813	1.97416	-2.05289	3.36541	-0.951764	2.35191	1.86354	2.25792
BnaA01CRK2	2.93734	3.62947	3.47145	3.61164	3.65076	1.76723	3.65306	3.40449	3.00522	2.53903	-0.0409718	3.16205	1.82416	3.31455	3.32582	3.18967
BnaA04CRK3	3.23343	2.82008	3.63773	3.77452	3.4813	4.02006	2.76702	1.87774	2.26664	1.10635	-1.02034	3.24031	3.07998	1.9631	2.28155	2.35643
BnaC04CRK3	3.00935	2.86453	3.50487	3.74556	3.64939	3.82171	3.16366	2.25096	1.74459	1.02715	-1.04097	2.20758	3.97039	2.34568	2.31962	2.02006
BnaC09CRK4	1.87617	0.746743	1.07313	1.8801	2.29866	-0.415037	2.29514	1.8532	1.91456	1.11237	-0.152003	1.21847	4.7902	1.42277	1.41034	1.21288
BnaA09CRK4	2.57386	1.99132	2.2135	2.96366	3.73455	0.207893	3.37657	2.43962	2.52256	2.13947	0.149259	2.39479	5.85212	2.06867	2.60952	2.58207
BnaC07CRK4	-2.62593	0.71721	-3.14561	-6.26534	-6.15843	-6.96578	-3.8365	-3.09542	-2.2723	-4.18442	-2.93236	0	-5.26534	0.604071	0.45628	-0.450084
BnaC08CRK5	5.15611	4.19212	4.22882	2.62854	3.46336	-0.529073	2.43883	4.62223	4.534	4.4524	0.794104	4.248	1.6457	4.61218	4.81951	4.98941
BnaA09CRK5	4.76331	4.0787	3.92125	4.17273	4.69315	-2.45008	4.18721	4.53238	4.45042	4.17608	1.8801	4.3238	2.16864	4.06273	4.61648	4.3765
BnaA01CRK5	2.40762	3.68963	3.67909	3.0769	4.66585	-4.38082	3.49147	2.2966	3.09255	2.46832	1.39397	3.71743	-4.26534	2.76638	2.43749	2.46624
BnaC01CRK5	2.41522	3.55029	3.47703	1.7566	3.3781	-6.50635	2.19692	1.60549	2.65076	1.65168	0.369606	3.38557	-3.55639	2.08338	2.15607	2.19535
BnaA06CRK6-1	1.52707	-3.75633	-4.87832	-5.50635	-5.38082	0	-3.699	-0.875672	-1.09542	-1.699	-4.32193	-1.87303	-0.0101344	0.0989585	-0.621488	-0.985645
BnaA06CRK6-2	3.03527	-0.592919	-2.30045	2.69777	2.73205	0	3.04474	-1.26188	-1.0499	-1.23447	0.870266	-0.595097	4.61365	-1.25498	-0.0877334	0.136191
BnaC03CRK6	2.81926	-0.117161	-1.20423	3.45365	3.61883	-4.15843	3.94907	-0.932361	-0.274041	-0.309359	2.96199	-0.968605	4.77357	-0.352916	-0.662004	-0.296899
BnaC08CRK6	0.56267	-4.50635	-6.96578	-0.982791	-4.71786	0	-0.275786	-3.9885	-3.73697	-4.03505	-1.64386	-3.14561	3.69388	-1.38836	-2.58208	-1.92687
BnaA05CRK7	4.7246	4.19022	4.46597	5.56544	5.30056	3.47171	4.91054	3.96023	4.4017	4.28237	1.36569	4.28947	3.48671	4.62597	4.75825	4.68751
BnaC04CRK7-1	4.57277	3.8512	4.00333	4.64622	4.52776	2.52482	3.86641	3.80983	4.38881	4.52419	1.47871	4.02308	2.94411	4.49051	4.8955	4.63946
BnaC04CRK7-2	2.20508	1.18587	0.71721	-0.597278	-0.951764	-1.27579	-0.461959	0.784085	1.28806	-0.104697	-6.64386	0.848798	-3.32193	0.659011	1.03422	1.22466
BnaA04CRK7	0.231432	0.243669	0.67717	-0.231075	0.183963	-2.71786	0.438293	0.0200577	0.888305	-0.54372	-4.87832	1.07793	-4.35107	1.47197	1.47093	1.57821
BnaA08CRK8	2.86196	2.25731	2.1375	1.53157	1.35332	-0.657445	0.329985	1.40871	1.72683	1.24184	1.84077	3.15186	0	2.0072	1.4756	1.55238
BnaC03CRK8	-6.50635	3.23496	-2.46594	0	0	0	-2.9771	2.85738	1.03422	3.54905	-2.8997	2.38929	-6.05889	0	-5.64386	0
BnaA03CRK8	2.72443	3.66925	2.02609	1.53605	1.97966	-0.844251	1.80364	1.54696	2.05102	2.39149	4.48742	3.55815	1.22651	3.27143	2.95791	2.75958
BnaC08CRK8	2.96329	1.50589	1.07587	2.12895	0.409255	0	-0.169745	0.204141	1.09424	-0.0679388	-0.951764	2.40299	-4.60823	1.74287	1.10434	1.1137
Table S7.2 qRT-PCR expression analysis of BnaCRKs in selected tissues
Gene Symbol	Root	Stem	Flower	Young-Flower	Leaf	Young-Leaf	Bud	Seed
BnaA03CRK1	2.33988	2.17874	7.64145	3.69088	0.849766	2.53109	2.94436	0.911202
	1.77429	3.68439	5.75743	4.95784	1.22437	2.07429	5.75383	1.11949
	1.98743	2.87417	7.75886	6.1346	0.961144	2.34682	1.76695	1.21767
BnaA05CRK2	1.9696	0.336134	1.67189	1.48743	0.513476	1.31082	2.12476	0.469233
	1.26948	0.570272	0.881389	1.3724	0.249198	1.26809	3.14984	0.842211
	1.41707	0.573333	0.427503	0.424502	0.380063	1.28697	1.19226	0.778242
BnaC04CRK3	3.39448	1.67482	4.64036	6.59108	0.736104	1.26791	3.14552	1.77632
	2.87558	2.53257	5.83795	5.38997	0.613545	0.861906	3.17747	1.3123
	4.01293	2.46123	5.5953	4.82453	0.861532	0.915062	3.22304	1.2433
BnaC09CRK4	0.933944	1.02104	0.787792	0.23738	1.05471	0.623698	0.340917	0.473631
	1.0242	1.25885	0.675327	0.193403	0.991051	0.460832	0.256556	0.436661
	1.04543	2.4735	0.709407	0.176332	0.50406	0.632415	0.156764	0.210976
BnaA01CRK5	1.35484	3.41684	0.486376	0.512539	0.702999	0.83768	0.345102	0.384044
	1.16739	3.53715	1.03776	0.559941	1.33281	0.788915	0.869814	0.428493
	0.632259	3.60889	0.842386	0.607315	1.5423	0.638428	0.187567	0.328058
BnaA06CRK6-1	0.946411	0.332175	0.428792	0.146759	0.181653	0.573601	0.140815	0.119085
	1.09512	0.341314	0.759128	0.281426	0.125718	0.418106	0.12682	0.256681
	0.964848	0.59397	0.31804	0.347906	0.498672	0.53877	0.078357	0.119345
BnaC04CRK7-2	0.709917	0.339611	0.109718	0.198056	3.02744	0.204486	0.26179	0.698025
	1.73216	0.668661	0.15419	0.227871	3.02174	0.290325	0.56416	0.50404
	0.813211	0.802613	0.393468	0.16213	3.18851	0.213313	0.223812	0.222713
BnaA08CRK8	1.83346	1.52645	2.51576	4.62996	1.14315	1.04524	2.20862	0.638066
	1.4208	2.25544	2.32195	3.81103	1.47566	0.976835	3.47709	1.24579
	1.82571	1.56338	1.71087	2.96673	2.00353	0.979409	1.50801	0.538801

## Sheet: Table S8
Table S8. cis-acting element prediction in the promoter regions of BnaCRKs
	Light Responsivness																					Stress and Defence Related																	Hormone Responsivness
Gene ID	Gap-box	3-AF binding site	Box 4	AT1-motif	LAMP-element	ACE	TCCC-motif	Box III	CAG-motif	chs-CMA1a	GT1-motif	I-box	TCT-motif	G-Box	GATA-motif	GA-motif	ATCT-motif	MRE	AE-box	Sp1	ATC-motif	ARE	ERE	LTR	ACTCATCCT sequence	A-box	MBS	STRE	NON-Box	TC-rich repeats	Myb-binding site	as-1	WRE3	DRE core	TGACG-motif	WUN-motif	W box	CGTCA-motif	MYB	MYC	TGA-element	ABRE4	ABRE3a	MBSI	TATC-box	DRE1	ABRE	TCA-element	AuxRR-core
BnaA03CRK1	1	1	1	0	0	0	0	0	0	0	1	0	2	6	1	0	1	0	2	0	0	2	1	1	0	0	0	1	0	0	0	2	0	0	2	0	0	2	2	4	1	0	0	0	0	0	4	0	0
BnaC03CRK1	0	0	1	0	0	0	0	0	0	0	3	1	1	3	0	0	0	2	2	0	0	7	3	1	0	0	0	1	0	1	0	0	0	0	0	0	3	0	2	1	1	1	1	0	0	1	1	0	0
BnaA05CRK2	0	0	0	0	0	0	0	0	0	0	1	1	1	5	0	1	0	0	0	0	0	1	1	1	0	0	0	0	0	1	1	1	0	0	1	1	0	1	5	3	0	1	1	0	0	0	4	0	0
BnaC05CRK2	0	0	1	0	0	0	0	0	0	0	0	1	2	4	0	0	0	0	1	0	0	3	0	1	0	0	0	3	0	1	1	0	0	0	0	1	1	0	4	3	0	4	0	0	0	0	0	2	1
BnaC01CRK2	0	0	3	0	0	0	1	1	0	1	1	0	2	4	1	1	1	0	1	0	0	2	2	2	0	0	2	0	0	1	0	0	0	0	0	2	0	0	9	5	1	1	0	0	0	0	0	1	1
BnaA01CRK2	0	0	4	0	0	0	1	0	0	1	3	0	2	4	1	0	1	0	1	0	0	3	1	0	0	0	1	0	0	1	0	1	0	0	1	1	0	1	8	7	3	1	1	0	0	0	2	1	1
BnaA04CRK3	0	0	3	0	0	0	0	0	0	0	2	0	1	1	1	0	1	0	1	0	0	3	4	1	0	1	0	0	0	1	0	0	0	0	0	0	0	0	5	2	0	1	1	0	0	0	1	0	0
BnaC04CRK3	0	1	3	0	0	1	0	0	1	0	0	0	2	1	1	0	1	0	1	0	0	3	1	2	0	3	0	0	0	1	0	0	0	0	0	0	0	0	3	4	0	1	1	1	0	0	1	0	0
BnaC09CRK4	0	0	1	0	0	0	1	0	0	0	2	0	3	1	0	1	0	1	1	0	0	4	2	0	0	1	0	0	0	1	0	3	0	0	3	1	1	3	7	9	1	0	0	0	0	0	1	3	0
BnaA09CRK4	0	0	2	0	0	0	1	0	0	0	2	0	3	0	0	1	0	0	1	0	0	3	0	0	0	1	0	0	0	1	0	3	0	0	3	1	1	3	5	9	0	0	0	0	1	0	1	1	0
BnaC07CRK4	0	0	2	0	0	0	0	0	0	0	6	0	1	4	0	0	0	0	2	0	1	3	1	0	0	1	0	1	0	1	1	0	0	1	0	0	2	0	9	7	1	0	0	0	0	0	3	1	0
BnaC08CRK5	0	0	4	0	0	0	0	0	0	0	0	0	1	0	0	0	0	0	0	0	0	2	1	0	0	1	0	1	1	0	0	1	2	0	1	1	1	1	4	2	3	0	0	0	1	0	0	0	0
BnaA09CRK5	0	1	2	0	0	0	0	0	0	0	1	0	4	3	0	0	0	0	0	0	0	0	1	1	1	0	1	1	0	2	1	1	1	0	1	0	0	1	4	4	0	1	1	0	0	0	3	1	0
BnaA01CRK5	0	0	5	0	0	0	0	0	0	0	1	0	0	0	0	1	0	0	0	0	0	2	1	1	0	0	0	2	0	1	0	0	1	0	0	1	0	0	2	3	0	0	0	0	0	0	2	1	0
BnaC01CRK5	0	0	2	0	0	1	0	0	0	0	2	0	0	1	0	2	0	0	0	0	0	1	6	1	0	0	1	2	0	2	0	0	1	0	0	1	0	0	3	3	0	1	1	0	0	1	1	0	0
BnaA06CRK6-1	0	0	2	0	1	0	1	0	0	0	2	0	0	2	0	1	0	1	0	1	0	4	0	0	0	0	0	2	0	0	2	2	0	0	2	0	2	2	3	1	2	0	0	0	1	0	2	0	0
BnaA06CRK6-2	1	1	2	0	0	1	0	0	0	1	1	0	1	2	0	0	1	0	0	0	0	3	6	2	0	1	0	0	0	1	1	1	0	0	1	2	2	1	4	10	3	1	1	0	0	0	3	1	0
BnaC03CRK6	1	1	3	0	0	1	0	0	0	1	1	0	0	3	1	0	0	0	0	0	0	1	4	0	0	1	1	0	0	0	0	1	0	0	1	3	3	1	2	8	3	1	1	0	0	0	4	0	0
BnaC08CRK6	1	0	4	0	1	0	0	0	0	0	0	0	0	5	0	0	0	1	0	0	0	6	0	0	0	1	0	0	0	0	0	3	0	0	3	1	3	3	2	4	4	0	0	0	0	0	4	2	0
BnaA05CRK7	0	1	4	0	0	0	0	0	0	0	1	2	1	4	2	0	1	2	2	0	0	3	0	0	0	0	0	4	0	1	0	2	1	0	2	2	0	2	4	2	1	1	1	0	0	1	3	0	0
BnaC04CRK7-1	0	2	3	0	0	0	0	0	0	1	3	3	0	5	3	0	1	1	1	0	0	3	1	0	0	0	0	3	0	0	1	1	1	0	1	2	0	1	4	2	1	1	1	0	0	1	5	0	0
BnaC04CRK7-2	0	0	0	0	0	0	1	0	0	0	0	0	1	1	2	0	0	2	0	0	0	3	1	2	0	0	1	3	0	1	1	2	0	1	2	0	0	2	5	0	0	1	1	0	0	1	1	1	0
BnaA04CRK7	0	0	1	0	1	0	0	0	0	0	1	0	1	1	2	0	0	1	0	0	0	4	3	2	0	0	1	3	0	0	0	0	0	0	0	0	0	0	4	0	0	0	0	0	1	0	0	0	0
BnaA08CRK8	0	0	5	0	0	0	0	0	0	0	3	1	1	2	0	1	1	2	0	0	0	1	2	0	0	0	1	0	0	0	0	0	0	0	0	1	1	0	6	3	0	1	1	0	0	0	2	0	0
BnaC03CRK8	0	0	1	1	0	0	1	1	0	0	3	0	1	6	0	1	0	0	0	0	0	2	1	0	0	1	0	0	0	0	1	0	0	0	0	0	0	0	7	4	3	1	1	0	1	0	5	1	1
BnaA03CRK8	0	0	1	0	0	0	1	1	0	0	3	0	1	7	1	1	0	0	0	0	0	2	1	0	0	0	0	0	0	0	1	1	0	0	1	0	0	1	6	4	2	1	1	0	1	0	5	1	0
BnaC08CRK8	0	0	4	0	0	0	0	0	0	0	2	0	1	2	0	1	0	1	0	0	0	2	5	0	0	0	1	0	0	0	0	0	0	0	0	2	0	0	8	4	2	2	1	1	0	0	3	1	0
[truncated: 23 more columns]

## Sheet: Table S9
Table S9.1 Gene-specific expression analysis of BnaCRKs under different stress conditions using RNA-seq datasets
Gene ID	Heat	Drought	Cold 4C	Freezing -4	Flood	Salinity	Clubroot	S.s Epidermis	S.s Mesophyll	S.s Vascular
BnaA03CRK1	0	0	0	0	0	-0.150676	-0.635688	0	0	0
BnaC03CRK1	1.01079	0.531333	0.332401	1.24472	0.564139	0	0	-2.4021	-2.73697	0
BnaA05CRK2	0	0	0	0	0	1.45587	-0.399692	0	0	0
BnaC05CRK2	0	0	0	0	0	0.766559	-0.135856	0	0	0
BnaC01CRK2	-0.586453	-0.241338	0.806164	0.613927	0.244384	-0.161378	-0.183165	0	0.421464	-2.58496
BnaA01CRK2	0	0	0	0	0	1.00529	-0.475951	0	0	0
BnaA04CRK3	-0.0824712	-0.285866	0	0	-0.439263	-0.202274	0.20933	-2.59626	-3.86053	0
BnaC04CRK3	2.57581	-0.00651452	0	0	-0.364215	-0.184926	0.117865	-1.29768	0.628031	0.20672
BnaC09CRK4	0	0	0	0	0	0.903071	-0.278605	0	0	0
BnaA09CRK4	0	0	0	0	0	-0.558321	0.045795	0	0	0
BnaC07CRK4	-0.505907	-0.974128	-1.56039	-1.12416	0.0901918	1.57543	-0.674519	-0.234465	2.58496	0
BnaC08CRK5	0	0	0	0	0	-1.03142	-3.42463e-05	0	0	0
BnaA09CRK5	0	0	0	0	0	-0.0571703	-0.154895	0	0	0
BnaA01CRK5	0	0	0	0	0	0.246558	-0.228829	0	0	0
BnaC01CRK5	0	0	0	0	0	0.772865	0.131109	0	0	0
BnaA06CRK6-1	-0.813183	0.409978	0	0	2.08944	2.96131	0.76446	0	0.0703893	3.77259
BnaA06CRK6-2	0.0301974	-0.00441338	0	0	1.71502	2.80362	-0.0375191	2.926	2.09954	3.68806
BnaC03CRK6	0	0	0	0	0	1.03177	-0.459845	0	0	0
BnaC08CRK6	-1.00079	-2.53819	-3.49176	-0.88256	1.78674	0	-0.727823	0	0	0.514573
BnaA05CRK7	-0.199737	-0.404114	0	0	0.463419	0.115041	-0.218204	-2.63941	-1.24101	-3.04213
BnaC04CRK7-1	-0.246097	-0.917769	-0.304651	-0.0260764	0.827251	-0.321032	-0.168973	-1.73884	-3.19401	-2.59282
BnaC04CRK7-2	1.28737	-0.529825	-0.819457	-0.690292	-0.265342	-0.0842118	0.055331	1	-1.16506	0.489038
BnaA04CRK7	0	0	0	0	0	-0.931424	-0.460294	0	0	0
BnaA08CRK8	0.489635	-0.24007	-0.581086	-0.552693	-0.379665	0.584762	-0.175205	0	3.58496	0
BnaC03CRK8	0	0	0	0	0	-0.950003	0	0	0	0
BnaA03CRK8	-3.24811	-0.215225	0	0	-0.956592	0.563896	0.0872827	0	-3.11548	0
BnaC08CRK8	0	0	0	0	0	-3.49981	0.611148	0	0	0
Table S9.2 qRT-PCR analysis of BnaCRKs under different stresses
Gene Name	CK	Cold	Drought	Salt	0-hpi		12-hpi	24-hpi	48-hpi
BnaA03CRK1	0.770074	0.311225	0.296203	0.103786	0.860807		1.00779	1.94062	1.2918
	0.815771	0.280342	0.112881	0.085309	0.742349		1.78509	2.10147	1.72413
	1.59184	0.246698	0.148771	0.174027	1.5649		1.85541	2.20607	0.811322
BnaA05CRK2	1.42369	0.204578	0.820211	0.495701	1.59143		0.85449	1.10083	0.62158
	0.880843	0.204859	0.746135	0.281358	0.801565		0.982201	1.20555	1.42068
	0.797418	0.327656	0.46312	0.499605	0.783921		1.35264	1.2071	0.743028
BnaC04CRK3	0.81862	0.315885	0.264681	0.336576	0.726294		2.75462	9.61263	0.493128
	0.649669	0.441832	0.265335	0.303869	0.591197		3.11029	8.39504	0.981319
	1.18451	0.24044	0.124884	0.209321	1.16446		4.36167	7.90179	0.649489
BnaC09CRK4	0.824969	0.227121	1.083	1.40903	0.922169		4.38629	3.94726	0.516693
	1.10766	0.327459	1.31511	1.74005	1.00797		6.52138	3.5511	0.97334
	1.09435	0.234641	0.807603	2.12137	1.07583		6.95927	4.64121	0.775541
BnaA01CRK5	0.661785	0.204604	0.357624	0.129888	0.739759		0.138681	0.177206	0.0561348
	0.919585	0.121038	0.309227	0.052734	0.83682		0.160324	0.149082	0.0805557
	1.6432	0.0699654	0.231064	0.0767443	1.61539		0.153723	0.172367	0.0452144
BnaA06CRK6-1	0.696512	0.796001	5.91302	3.08176	0.778577		0.945304	12.5214	3.11309
	0.746525	0.694662	4.48272	3.49198	0.679336		1.61825	12.5679	4.62643
	1.92321	0.509297	5.29993	4.04551	1.89066		1.86435	8.13776	3.78117
BnaC04CRK7-2	1.06893	0.019585	0.1655	0.0101985	1.19487		0.141599	0.849725	0.165881
	0.826154	0.0188539	0.117507	0.0190695	0.751798		0.266483	0.992982	0.401443
	1.13237	0.0076852	0.158366	0.0237692	1.11321		0.341024	1.34376	0.227408
BnaA08CRK8	0.827921	0.145279	3.92664	6.69791	0.92547		3.16432	4.46378	1.44389
	0.827564	0.269662	2.3565	5.96693	0.753081		2.28015	5.27866	2.45977
	1.45952	0.152126	2.3392	8.01615	1.43481		3.94062	4.45168	2.1623

## Sheet: Table S10
Table S10. Prediction of Bna-miRNA targeting sites in the BnaCRKs
miRNA_Accesion	Gene symbol	Target_Accession	Start	End	miRNA aligned sequence	alignment length	Inhibiton	e-value	UPE
Bna-miR156	BnaA09CRK5	BnaA09G0471500ZS	1001	1021	GACAGAAGAGAGUGAGCACAU	21	Cleavage	4.5	-12.44
	BnaC08CRK5	BnaC08G0307300ZS	1001	1021	GACAGAAGAGAGUGAGCACAU	21	Cleavage	4.5	-12.59
Bna-miR159	BnaA09CRK5	BnaA09G0471500ZS	1480	1500	UUUGGAUUGAAGGGAGCUCUA	21	Cleavage	4.5	-11.69
	BnaC08CRK5	BnaC08G0307300ZS	1480	1500	UUUGGAUUGAAGGGAGCUCUA	21	Cleavage	4.5	-11.02
	BnaC01CRK5	BnaC01G0266400ZS	1453	1473	UUUGGAUUGAAGGGAGCUCUA	21	Cleavage	4.5	-11.21
	BnaC04CRK7-1	BnaC04G0023800ZS	1432	1452	UUUGGAUUGAAGGGAGCUCUA	21	Cleavage	5	-13.48
	BnaA05CRK7	BnaA05G0022100ZS	1429	1449	UUUGGAUUGAAGGGAGCUCUA	21	Cleavage	5	-11.01
	BnaA03CRK1	BnaA03G0201000ZS	1402	1422	UUUGGAUUGAAGGGAGCUCUA	21	Cleavage	5	-13.13
	BnaC03CRK1	BnaC03G0237400ZS	1402	1422	UUUGGAUUGAAGGGAGCUCUA	21	Cleavage	5	-10.69
	BnaC08CRK6	BnaC08G0296700ZS	1608	1627	UUUGGAUUGAAGGGAGCUCUA	21	Cleavage	5	-13.21
	BnaA06CRK6-1	BnaA06G0159600ZS	1605	1624	UUUGGAUUGAAGGGAGCUCUA	21	Cleavage	5	-11.2
Bna-miR2111	BnaC04CRK3	BnaC04G0612200ZS	1566	1585	UAAUCUGCAUCCUGAGGUUUA	21	Cleavage	5	-13.34
Bna-miR319	BnaC08CRK6	BnaC08G0296700ZS	1608	1626	UUGGACUGAAGGGAGCUCCC	20	Cleavage	5	-10.14
	BnaA06CRK6-1	BnaA06G0159600ZS	1605	1623	UUGGACUGAAGGGAGCUCCC	20	Cleavage	5	-8.06
Bna-miR393	BnaA04CRK3	BnaA04G0294600ZS	1227	1247	UCCAAAGGGAUCGCAUUGAUC	21	Cleavage	5	-13.63
	BnaC04CRK3	BnaC04G0612200ZS	1227	1247	UCCAAAGGGAUCGCAUUGAUC	21	Cleavage	5	-14.11
Bna-miR394	BnaC04CRK7-1	BnaC04G0023800ZS	1215	1235	UUUGGCAUUCUGUCCACCUCC	21	Translation	5	-8.15
	BnaA05CRK7	BnaA05G0022100ZS	1212	1232	UUUGGCAUUCUGUCCACCUCC	21	Translation	5	-7.92
	BnaC03CRK1	BnaC03G0237400ZS	1185	1205	UUUGGCAUUCUGUCCACCUCC	21	Translation	5	-9.9
Bna-miR395	BnaA05CRK7	BnaA05G0022100ZS	342	362	CUGAAGUGUUUGGGGGAACUC	21	Cleavage	4	-18.03
	BnaC04CRK7-2	BnaC04G0305600ZS	333	353	CUGAAGUGUUUGGGGGAACUC	21	Cleavage	5	-13.97
	BnaC04CRK7-2	BnaC04G0305600ZS	1696	1716	CUGAAGUGUUUGGGGGAACUC	21	Cleavage	5	-13.97
Bna-miR408	BnaA06CRK6-2	BnaA06G0269200ZS	355	375	UGCACUGCCUCUUCCCUGGCU	21	Cleavage	5	-12.47
	BnaC03CRK6	BnaC03G0564200ZS	355	375	UGCACUGCCUCUUCCCUGGCU	21	Cleavage	5	-9.96
Bna-miR9408	BnaA05CRK7	BnaA05G0022100ZS	574	595	UUUCAUCUUAGAGAAUGUUGUU	22	Translation	5	-7.96
	BnaA09CRK5	BnaA09G0471500ZS	1003	1024	UUUCAUCUUAGAGAAUGUUGUU	22	Cleavage	5	-7.9
	BnaC08CRK5	BnaC08G0307300ZS	1003	1024	UUUCAUCUUAGAGAAUGUUGUU	22	Cleavage	5	-7.9
Bna-miR9557	BnaC01CRK5	BnaC01G0266400ZS	33	53	UUUUGCGUUUCAACUCGGUCC	21	Translation	5	-14.68
Bna-miRN273	BnaA04CRK3	BnaA04G0294600ZS	140	160	GGUUCGUUGAUCUGGCCGGAC	21	Cleavage	3	-19.05
Bna-miRN274	BnaC04CRK7-2	BnaC04G0305600ZS	283	303	ACUCCCUACGGGGAUAGUUGG	21	Cleavage	5	-10.86
Bna-miRN277	BnaC05CRK2	BnaC05G0404800ZS	1549	1570	UCCAUCGAUCGAGUGACGGCUU	22	Cleavage	5	-13.2
Bna-miRN282	BnaC03CRK1	BnaC03G0237400ZS	1166	1187	UUUGGAAGAUUGUCUAUGGUUG	22	Cleavage	4.5	-8.66
Bna-miRN284	BnaC07CRK4	BnaC07G0365000ZS	1074	1095	AGAUAUUAGAGGUUAGGGUCGG	22	Cleavage	4	-12.57
	BnaA01CRK5	BnaA01G0212100ZS	1044	1065	AGAUAUUAGAGGUUAGGGUCGG	22	Cleavage	4.5	-10.69
	BnaC09CRK4	BnaC09G0057800ZS	1062	1083	AGAUAUUAGAGGUUAGGGUCGG	22	Cleavage	4.5	-11.91
	BnaA09CRK5	BnaA09G0471500ZS	1098	1119	AGAUAUUAGAGGUUAGGGUCGG	22	Cleavage	5	-18.09
	BnaC08CRK5	BnaC08G0307300ZS	1098	1119	AGAUAUUAGAGGUUAGGGUCGG	22	Cleavage	5	-14.57
	BnaC01CRK5	BnaC01G0266400ZS	1071	1092	AGAUAUUAGAGGUUAGGGUCGG	22	Cleavage	5	-8.96
Bna-miRN285	BnaC05CRK2	BnaC05G0404800ZS	1147	1168	UUCGGGGAUUUCUGUGUAGGCU	22	Cleavage	4.5	-15.97
	BnaA09CRK5	BnaA09G0471500ZS	333	354	UUCGGGGAUUUCUGUGUAGGCU	22	Translation	5	-12.91
Bna-miRN287	BnaA04CRK3	BnaA04G0294600ZS	266	285	AUAUGGCGGGGGGGGGGGGG	20	Cleavage	4.5	-21.52
	BnaC04CRK3	BnaC04G0612200ZS	201	220	AUAUGGCGGGGGGGGGGGGG	20	Cleavage	5	-23.48
	BnaA08CRK8	BnaA08G0030900ZS	102	121	AUAUGGCGGGGGGGGGGGGG	20	Cleavage	5	-26.34
Bna-miRN290	BnaC04CRK3	BnaC04G0612200ZS	857	879	AUCGGUGGGCUUUAGGU-UGAGG	22	Cleavage	5	-18.36

[truncated: 2 more sheets: Table S11, Table S12]
