# Supplementary figures and images for: Functional Characterization of the Cystine-Rich-Receptor-like Kinases (CRKs) and Their Expression Response to Sclerotinia sclerotiorum and Abiotic Stresses in Brassica napus
Source: MDPI journal article supplement (doi:10.3390/ijms24010511), 2022-12-28

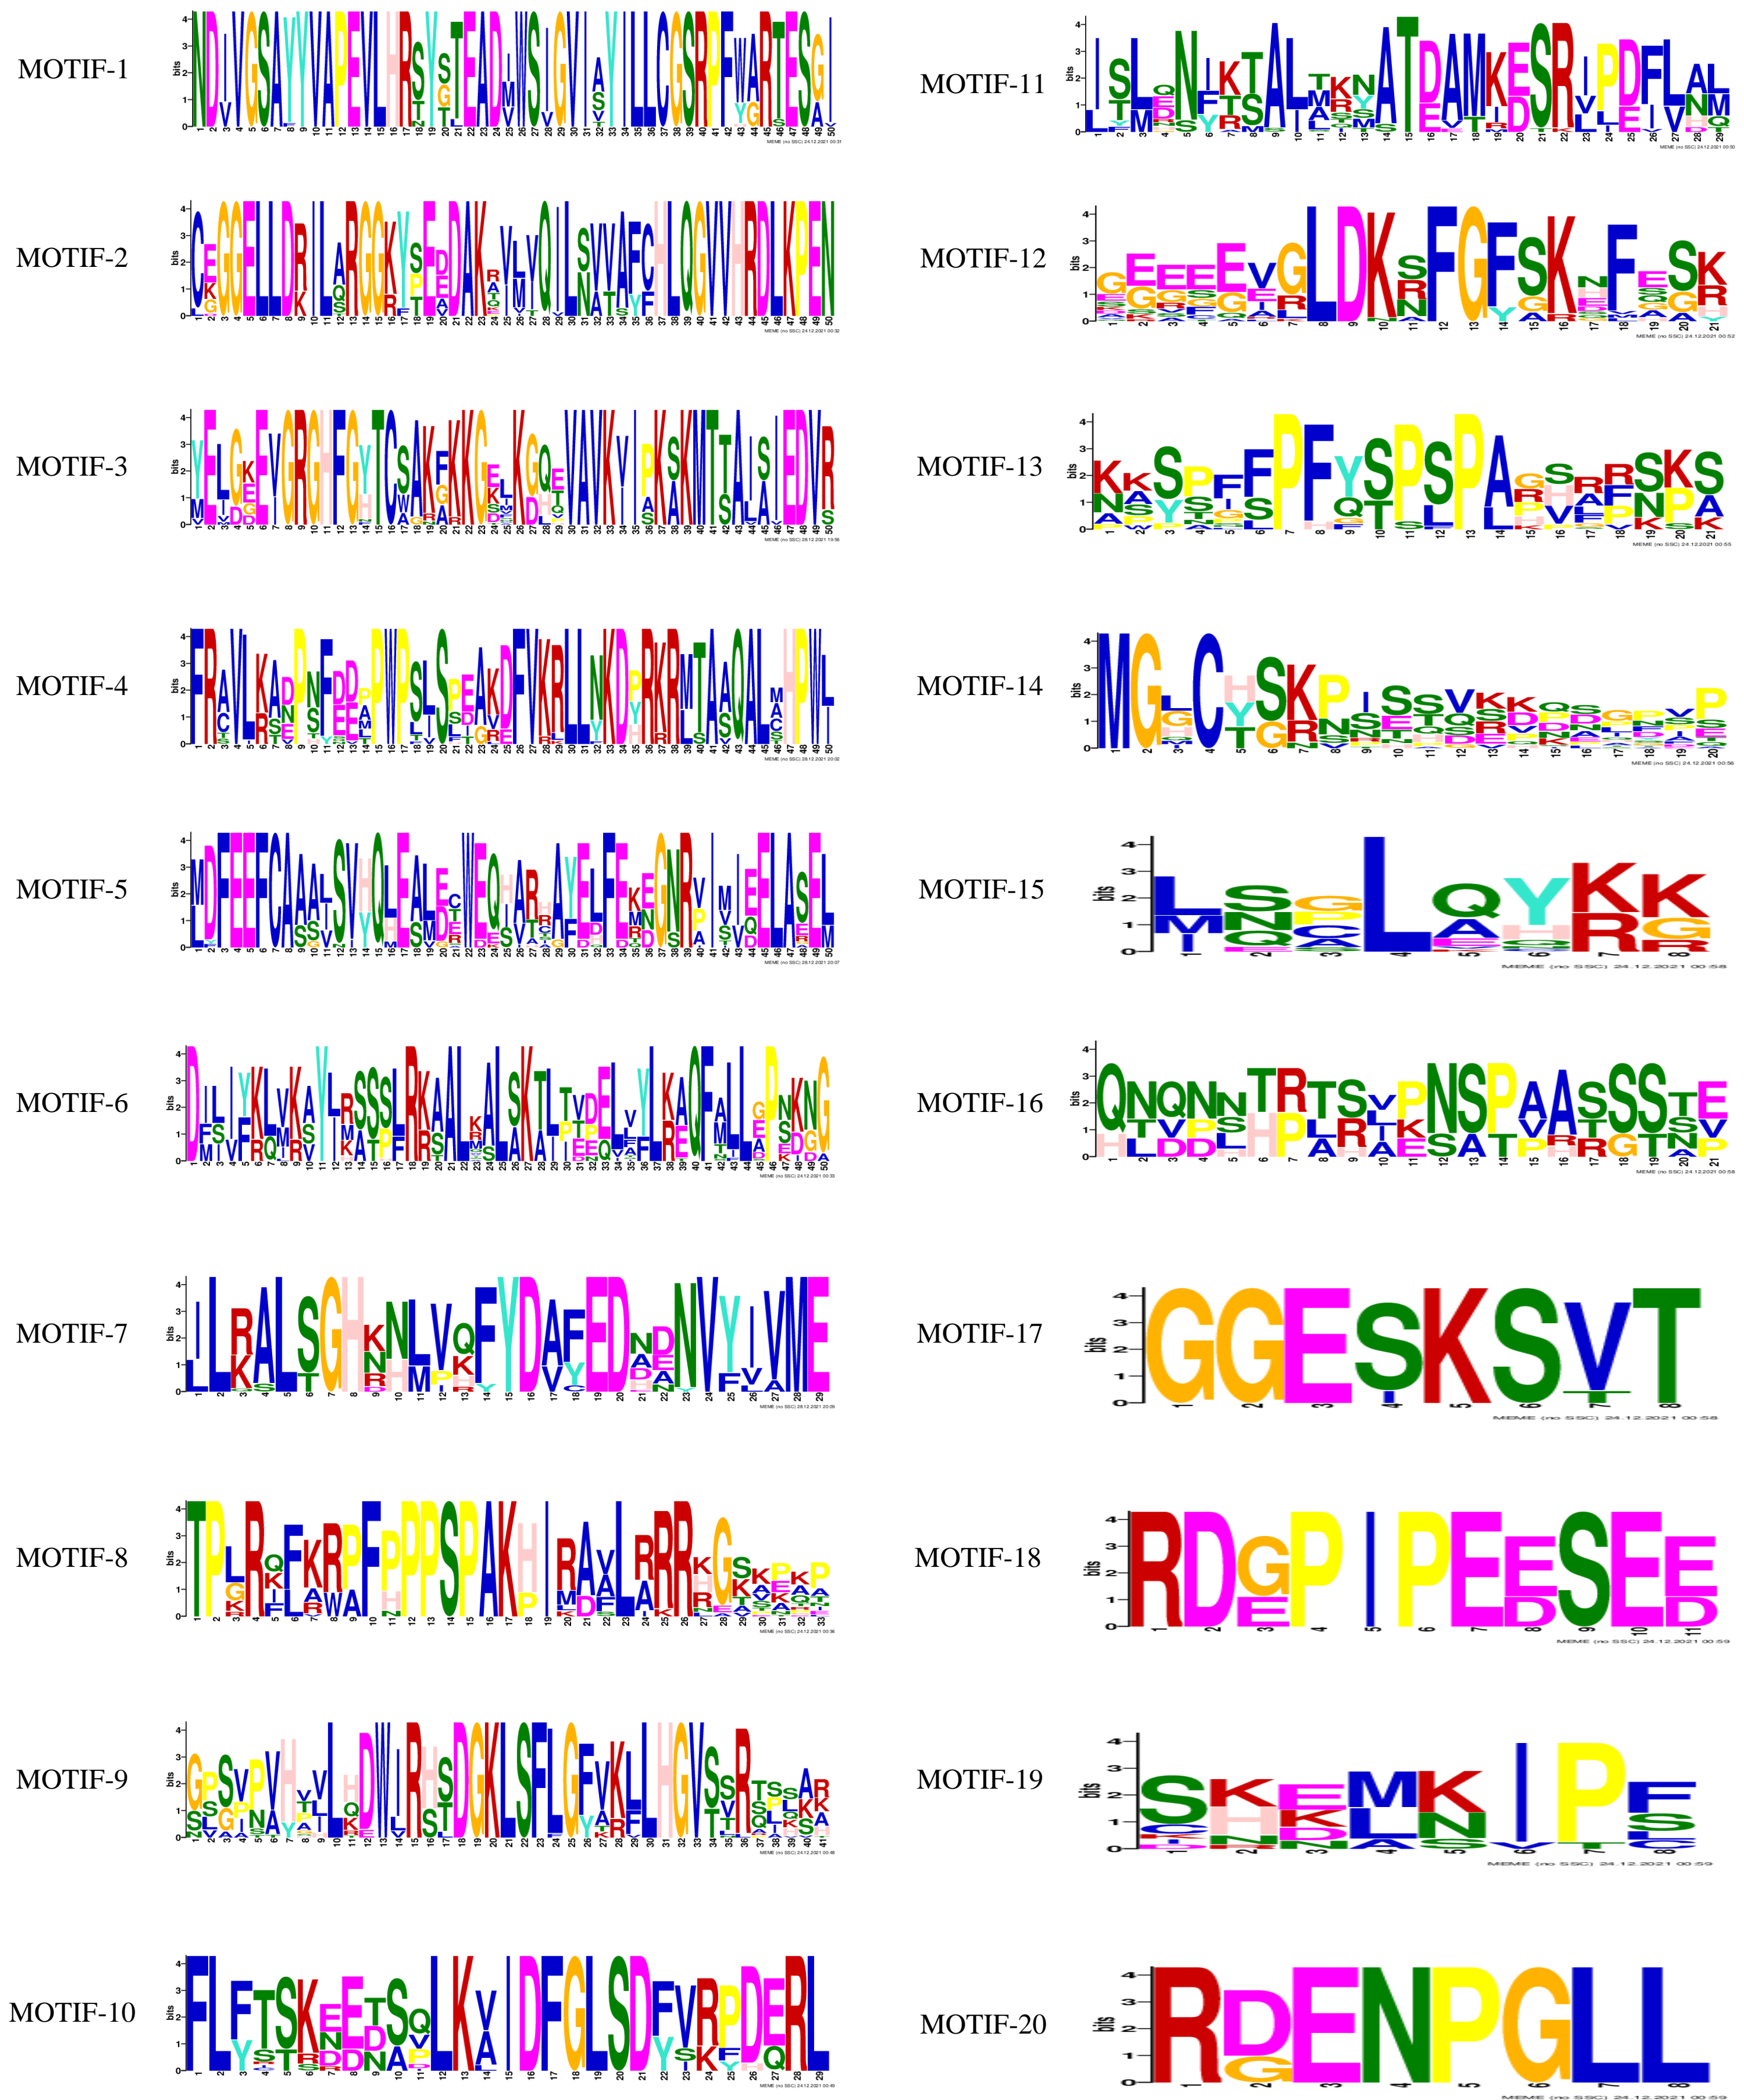

**Fig. S3.** Schematic diagram of *BnCRKs* motifs.

Supplement: s1 [file s1]

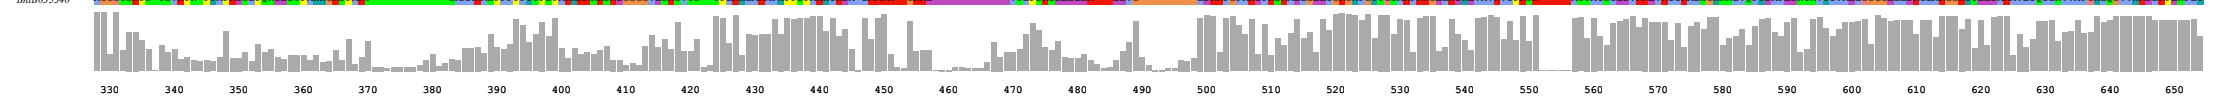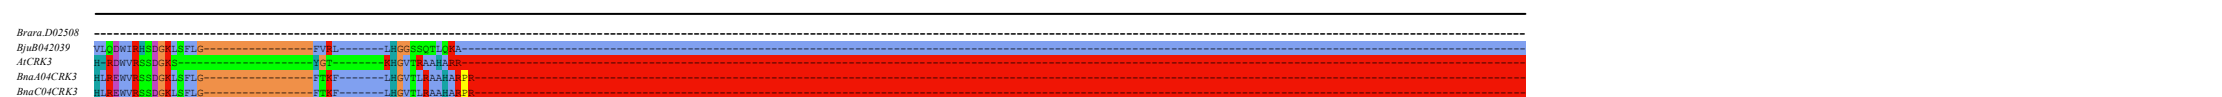

Fig. S2. Multiple sequence alignment of CRK proteins from *Brassicaceae* species

Supplement: s1 [file s1]
